# Supplementary material for: Is length of time in a stroke unit associated with better outcomes for patients with stroke in Australia? An observational study
Source: PubMed Central journal article supplement — BMJ Open. 2018 Nov 12;8(11):e022536. doi: 10.1136/bmjopen-2018-022536 (PMC6252690; doi:10.1136/bmjopen-2018-022536), 2018-11-12
Supplement: bmjopen-2018-022536.draft_revisions.pdf [file bmjopen-2018-022536.draft_revisions.pdf]

# BMJ Open

BMJ Open is committed to open peer review. As part of this commitment we make the peer review history of every article we publish publicly available.

When an article is published we post the peer reviewers' comments and the authors' responses online. We also post the versions of the paper that were used during peer review. These are the versions that the peer review comments apply to.

The versions of the paper that follow are the versions that were submitted during the peer review process. They are not the versions of record or the final published versions. They should not be cited or distributed as the published version of this manuscript.

BMJ Open is an open access journal and the full, final, typeset and author-corrected version of record of the manuscript is available on our site with no access controls, subscription charges or pay-per-view fees (<http://bmjopen.bmj.com>).

If you have any questions on BMJ Open's open peer review process please email [info.bmjopen@bmj.com](mailto:info.bmjopen@bmj.com)

# BMJ Open

## Is length of time in a stroke unit associated with better outcomes for patients with stroke in Australia? An observational study

|                               |                                                                                                                                                                                                                                                                                                                                                                                                                                                                                                                                                                                                                                                                                                                                                                                                                                                                                                                                                                                                                                                                                                                                                                                                                                                                                                                             |
|-------------------------------|-----------------------------------------------------------------------------------------------------------------------------------------------------------------------------------------------------------------------------------------------------------------------------------------------------------------------------------------------------------------------------------------------------------------------------------------------------------------------------------------------------------------------------------------------------------------------------------------------------------------------------------------------------------------------------------------------------------------------------------------------------------------------------------------------------------------------------------------------------------------------------------------------------------------------------------------------------------------------------------------------------------------------------------------------------------------------------------------------------------------------------------------------------------------------------------------------------------------------------------------------------------------------------------------------------------------------------|
| Journal:                      | <i>BMJ Open</i>                                                                                                                                                                                                                                                                                                                                                                                                                                                                                                                                                                                                                                                                                                                                                                                                                                                                                                                                                                                                                                                                                                                                                                                                                                                                                                             |
| Manuscript ID                 | bmjopen-2018-022536                                                                                                                                                                                                                                                                                                                                                                                                                                                                                                                                                                                                                                                                                                                                                                                                                                                                                                                                                                                                                                                                                                                                                                                                                                                                                                         |
| Article Type:                 | Research                                                                                                                                                                                                                                                                                                                                                                                                                                                                                                                                                                                                                                                                                                                                                                                                                                                                                                                                                                                                                                                                                                                                                                                                                                                                                                                    |
| Date Submitted by the Author: | 22-Feb-2018                                                                                                                                                                                                                                                                                                                                                                                                                                                                                                                                                                                                                                                                                                                                                                                                                                                                                                                                                                                                                                                                                                                                                                                                                                                                                                                 |
| Complete List of Authors:     | <p>Busingye, Doreen ; Monash University, Translational Public Health and Evaluation Division, Stroke and Ageing Research, School of Clinical Sciences at Monash Health</p> <p>Kilkenny, Monique; Monash University, Translational Public Health and Evaluation Division, Stroke and Ageing Research, School of Clinical Sciences at Monash Health; The Florey Institute of Neuroscience and Mental Health, Stroke Division</p> <p>Purvis, Tara; Monash University, Translational Public Health and Evaluation Division, Stroke and Ageing Research, School of Clinical Sciences at Monash Health</p> <p>Kim, Joosup; Monash University, Translational Public Health and Evaluation Division, Stroke and Ageing Research, School of Clinical Sciences at Monash Health; The Florey Institute of Neuroscience and Mental Health, Stroke Division</p> <p>Middleton, Sandy; Nursing Research Institute, St Vincent's Health Australia (Syd) and Australian Catholic Univeristy</p> <p>Campbell, Bruce; Royal Melbourne Hospital, Department of Medicine and Neurology</p> <p>Cadilhac, Dominique; Monash University, Translational Public Health and Evaluation Division, Stroke and Ageing Research, School of Clinical Sciences at Monash Health; The Florey Institute of Neuroscience and Mental Health, Stroke Division</p> |
| Keywords:                     | Stroke < NEUROLOGY, Quality in health care < HEALTH SERVICES ADMINISTRATION & MANAGEMENT, health services reserach, outcomes                                                                                                                                                                                                                                                                                                                                                                                                                                                                                                                                                                                                                                                                                                                                                                                                                                                                                                                                                                                                                                                                                                                                                                                                |
|                               |                                                                                                                                                                                                                                                                                                                                                                                                                                                                                                                                                                                                                                                                                                                                                                                                                                                                                                                                                                                                                                                                                                                                                                                                                                                                                                                             |

SCHOLARONE™  
Manuscripts

1  
2  
3 1 Is length of time in a stroke unit associated with better  
4  
5 2 outcomes for patients with stroke in Australia? An  
6  
7 3 observational study  
8  
9  
10  
11 4  
12  
13  
14 5

15 6 Doreen Busingye<sup>1</sup>, Monique F. Kilkenny<sup>1,2</sup>, Tara Purvis<sup>1</sup>, Joosup Kim<sup>1,2</sup>, Sandy Middleton<sup>3</sup>,  
16 7 Bruce C.V. Campbell<sup>4</sup>, Dominique A. Cadilhac<sup>1,2</sup>  
17  
18  
19 8  
20 9  
21  
22 10

23 11 <sup>1</sup>Translational Public Health and Evaluation Division, Stroke and Ageing Research, School of  
24 12 Clinical Sciences at Monash Health, Monash University, Clayton, Victoria, Australia  
25  
26  
27

28 13 <sup>2</sup>Stroke Division, The Florey Institute of Neuroscience and Mental Health, University of  
29 14 Melbourne, Heidelberg, Victoria, Australia  
30  
31

32 15 <sup>3</sup>Nursing Research Institute, St Vincent's Health Australia (Sydney) and Australian Catholic  
33 16 University New South Wales, Australia  
34  
35

36 17 <sup>4</sup>Department of Medicine and Neurology, Royal Melbourne Hospital, University of  
37 18 Melbourne, Parkville, Victoria, Australia  
38  
39  
40  
41 19  
42  
43 20  
44  
45 21

46 22 **\*Corresponding Author**

47 23 Email: [doreen.busingye@monash.edu](mailto:doreen.busingye@monash.edu), [busingyedoreen@gmail.com](mailto:busingyedoreen@gmail.com) (DB)  
48  
49  
50  
51 24  
52  
53 25  
54  
55 26  
56  
57  
58  
59  
60

## 27 **Abstract**

28 **Objective:** Spending at least 90% of hospital admission in a stroke unit (SU) is a  
29 recommended indicator of receiving high quality stroke care. However, whether this makes a  
30 difference to patient outcomes is unknown. We aimed to investigate outcomes and factors  
31 associated with patients with acute stroke spending at least 90% of their admission in a SU,  
32 compared to those having less time in the SU.

33 **Design:** Observational study using cross-sectional data

34 **Setting:** Data from hospitals who participated in the 2015 Stroke Foundation National Audit:  
35 Acute Services (Australia) and had a SU. This audit includes an organizational survey and  
36 retrospective medical record audit of approximately 40 admissions from each hospital.

37 **Participants:** Patients admitted to a SU during their acute admission were included.

38 **Outcome measures:** Hospital-based patient outcomes included length of stay, independence  
39 on discharge, severe complications and discharge destination. Patient, organizational, and  
40 process indicators were included in multilevel logistic modelling to determine factors  
41 associated with spending at least 90% of their admission in a SU.

42 **Results:** Eighty-eight hospitals with a SU audited 2655 cases (median age 76 years, 55%  
43 male). Patients who spent at least 90% of their admission in a SU experienced: a length of  
44 stay that was two days shorter (coefficient -2.77 95% CI -3.45, -2.10), fewer severe  
45 complications (aOR: 0.60; 95% CI: 0.43, 0.84) and were less often discharged to residential  
46 aged care (aOR: 0.59; 95% CI: 0.38, 0.94) than those who had less time in the SU. Patients  
47 admitted to a SU within three hours of hospital arrival were three times more likely to spend  
48 at least 90% of their admission in a SU.

1  
2  
3 49 **Conclusion:** Spending at least 90% of time in a SU is an excellent measure of stroke care  
4  
5 50 quality as it results in improved patient outcomes. Direct admission to stroke units is  
6  
7 51 warranted.  
8  
9

10 52

## 11 12 13 53 **ARTICLE SUMMARY**

### 14 15 16 54 **Strengths and limitations of this study:**

- 17  
18  
19 55 • While spending 90% of time in the SU is considered an important quality of care measure,  
20  
21 56 there is limited evidence that this is associated with better outcomes in patients with stroke. A  
22  
23 57 strength of this research is that it has provided further evidence of the importance which has  
24  
25 58 implications for clinical practice and development of new models of stroke care.
- 26  
27  
28 59 • The study involved a large comprehensive dataset, which provided national representation.
- 29  
30  
31 60 • Standardised data collection and an inclusive data dictionary was provided to data  
32  
33 61 abstractors to minimise reporting bias and ensure data were reliably collected.
- 34  
35  
36 62 • For some outcomes, only dates, rather than times were collected, which would have  
37  
38 63 provided more accuracy

39  
40  
41 64

42  
43  
44 65

45  
46  
47 66

48  
49  
50 67

51  
52  
53 68

54  
55  
56 69

## 70 **Introduction**

71           Stroke remains a major global health challenge because it is a leading cause of death  
72 and major disability.<sup>1</sup> It is well-established that patients treated in stroke units (SUs) are more  
73 likely to receive evidence-based clinical practices, have better survival and self-rated quality  
74 of life compared to those receiving care in other wards.<sup>2-4</sup> It is recommended that people with  
75 stroke should be admitted directly to a SU, preferably within three hours of stroke onset,<sup>5</sup> and  
76 that they should also be treated in a SU throughout their admission unless their stroke is not  
77 the main clinical problem.<sup>6</sup> Therefore, spending most (at least 90%) of hospital admission in  
78 a SU is recommended as one of the important indicators of high quality acute stroke care.<sup>7,8</sup>

79           However, there is limited evidence that this process of care is associated with better  
80 outcomes in patients with stroke. We aimed to investigate outcomes and factors associated  
81 with patients with acute stroke spending at least 90% of their admission in a SU, compared to  
82 those having less time in the SU.

## 83 **Materials and methods**

84           The description and reporting of this study is based on the Strengthening the  
85 Reporting of Observational Studies in Epidemiology (STROBE) statement.<sup>9</sup>

## 86 **Study design and data source**

87           This observational study used data from hospitals participating in the Australian  
88 Stroke Foundation Acute Services Audit Program conducted in 2015. The audit program is  
89 run biennially to provide cross-sectional data on clinical performance, and has two  
90 components: an organizational survey and clinical audit.<sup>10</sup> Detailed methods for the Audit  
91 Program have been described elsewhere.<sup>10</sup> In brief, data obtained in the organizational survey  
92 are used to describe aspects of acute stroke services, including bed numbers, admissions per  
93 year and available resources e.g. stroke units. Data collected in the clinical audit are used to

1  
2  
3 94 identify adherence to clinical guidelines and provide evidence on areas to improve the quality  
4  
5 95 of care. Participation in the audit was voluntary and all Australian acute stroke services  
6  
7 96 admitting at least three acute stroke patients per year were eligible to participate. Data for the  
8  
9 97 first 40 or more consecutive acute stroke admissions (from 1 September 2014 and discharged  
10  
11 98 by 28 February 2015) were collected by trained data abstractors from June to August 2015.  
12  
13 99 To obtain a more representative sample, larger hospitals were encouraged to provide more  
14  
15 100 cases. Patients with a primary diagnosis of acute stroke (ICD-10 codes: I61, I62.9, I63, I64)  
16  
17 101 were eligible to be included in the audit.  
18  
19

## 102 **Patient population and definitions**

20  
21  
22  
23 103 Data for patients who were treated at a hospital with a SU and only those patients  
24  
25 104 admitted to a SU during their acute admission were included. Time spent in a SU (SU time)  
26  
27 105 was determined by subtracting the date of discharge from the SU, from the date of admission  
28  
29 106 to the SU. To determine patients who spent at least 90% of their admission in a SU, the SU  
30  
31 107 time was divided by total length of stay (LOS) in the hospital (total LOS; calculated by  
32  
33 108 subtracting date of discharge from hospital or death from date of admission to hospital) and  
34  
35 109 the result multiplied by one hundred ( $[\text{SU time}/\text{total LOS}] * 100$ ). We further determined  
36  
37 110 early/late admission to the SU as  $\leq 3$  hours versus  $> 3$  hours from arrival to the emergency  
38  
39 111 department (ED) to admission on the SU. For patients whose stroke occurred while they were  
40  
41 112 already in hospital, date of stroke onset was used as a surrogate for date of admission to  
42  
43 113 hospital and arrival to ED.  
44  
45

46  
47 114 The following patient outcomes were assessed: LOS, death, level of independence on  
48  
49 115 discharge, severe complications and discharge destination. LOS was defined as the total  
50  
51 116 length of time from admission to the hospital to discharge from the hospital or death. Level of  
52  
53 117 independence on discharge was defined as a modified Rankin scale (mRS) score of zero to  
54  
55 118 two. A severe complication was a new event in hospital considered to be incapacitating, life  
56  
57  
58  
59  
60

1  
2  
3 119 threatening and one that prolonged hospital admission such as pneumonia, falls, fever,  
4  
5 120 urinary tract infection, seizures and deep vein thrombosis. Discharge destinations included  
6  
7 121 private residence, inpatient rehabilitation or residential aged care facility.

8  
9 122 Only valid yes/no responses were included in the analyses for data related to medical  
10  
11 123 history and the presence of symptoms on presentation to hospital. For data relating to  
12  
13 124 processes of care, e.g. received care in a SU, not documented and unknown responses were  
14  
15 125 assumed to be negative and included in the denominator. To minimise bias, only patients with  
16  
17 126 valid admission and discharge (SU and hospital) time or date were included.

## 127 **Statistical analysis**

128 Univariable analyses were performed to determine differences between patients who  
129 spent at least 90% and those who spent less than 90% of their admission in a SU. The chi-  
130 square test was used for categorical variables. The nonparametric Wilcoxon Mann-Whitney  
131 rank sum test was used for continuous variables that were not normally distributed.

132 Multilevel random effects logistic regression analyses, with level defined as hospital  
133 were undertaken to determine:

- 134 i) the association between spending at least 90% of admission in a SU and in-  
135 hospital outcomes such as death, level of independence on discharge (mRS 0-2),  
136 severe complications and various discharge destinations.
- 137 ii) factors associated with spending at least 90% of the admission in a SU.

138 For the continuous outcome of LOS, a median regression model with bootstrap  
139 estimated standard errors was undertaken. A parsimonious approach to multivariable model  
140 development was used and independent variables with statistical significance ( $p \leq 0.05$ ) from  
141 univariable analyses were included.



1  
2  
3 142 To determine factors associated with spending at least 90% of the admission in a SU,  
4  
5 143 independent variables considered for inclusion in multivariable analyses were patient factors  
6  
7 144 e.g. age; health system factors e.g. private hospital, presence of a stroke care coordinator and  
8  
9 145 onsite neurosurgery; and clinical process factors e.g. admission to SU within three hours of  
10  
11 146 arrival to ED. Other potential confounders including stroke type (ischemic vs intracerebral  
12  
13 147 hemorrhage and unknown) and stroke severity factors such as inability to walk, arm  
14  
15 148 weakness, and speech impairment on admission and incontinence within 72 hours, which are  
16  
17 149 based on the Counsell et al validated prognostic model for comparing patient outcomes,<sup>11</sup>  
18  
19 150 were included. This validated model<sup>11</sup> has been compared against a model using age plus  
20  
21 151 scores on the National Institutes of Health Stroke Scale and both prognostic models  
22  
23 152 performed well overall, thus the choice between them should be based on clinical and  
24  
25 153 practical considerations.<sup>12</sup>  
26  
27

28  
29 154 Models for association between length of time spent in a SU and in-hospital outcomes  
30  
31 155 were adjusted for patient characteristics (e.g. premorbid function and past history of atrial  
32  
33 156 fibrillation), variables with clinical importance (e.g. sex and age), stroke type and stroke  
34  
35 157 severity factors. Sensitivity analyses, including other cut offs for percentage of admission  
36  
37 158 spent in a SU (e.g.  $\geq 50$  to  $<60$ ,  $\geq 60$  to  $<70$ ,  $\geq 70$  to  $<80$ ,  $\geq 80$  to  $<90$ ) were undertaken to  
38  
39 159 determine a potential dose effect with LOS, severe complications, and independence on  
40  
41 160 discharge.  
42  
43

44 161 Standard techniques were implemented to check for collinearity. Values of  $p < 0.05$   
45  
46 162 were considered significant for all analyses. Adjusted odds ratio or coefficients with 95%  
47  
48 163 confidence intervals (CIs) were calculated. Stata 12.0 (Stata Corporation, 2012, TX)  
49  
50 164 statistical software was used for all analyses.  
51

52 165 Ethics approval was granted through Monash University Human Research Ethics  
53  
54 166 Committee (CF16/825-2016000402).  
55  
56  
57  
58  
59  
60

## 167 **Results**

168 Overall, the clinical audit comprised data from 4087 patients at 112 hospitals. Most  
169 were public hospitals (n=104, 93%) and were located in metropolitan areas (n=105, 94%).  
170 Twenty-four of these hospitals (n=664 patients) did not have a SU. Of the patients admitted  
171 to a hospital with a SU, 20% (n=684) were not treated in a SU at any time during their  
172 admission. There were 2739 patients treated in a SU at some time during their admission.  
173 Eighty-four patients with invalid or missing dates of admission or discharge from the hospital  
174 or SU were excluded from the analyses. Overall, 2655 patients were assessed, whereby  
175 almost two-thirds (64%) spent at least 90% of their admission in a SU. Supplemental Table 1  
176 provides the characteristics of patients who were and were not treated in a SU at hospitals  
177 with a SU. Compared to patients not treated on the SU, patients admitted in a SU were more  
178 likely to be younger, male, independent prior to stroke and have an ischemic stroke  
179 (Supplemental Table 1).

### 180 **Patient characteristics and clinical processes**

181 The median age for all included patients (n=2655) was 76 years (Q1:65, Q3:84) and  
182 55% were male (Table 1 and Supplemental Table 2). Patients who spent at least 90% of their  
183 admission in a SU were more likely to be younger, and have less severe strokes i.e. fewer  
184 were unable to walk on admission or incontinent within 72 hours of admission compared to  
185 those who spent less than 90% of their admission in a SU (Table 1).

186 Importantly, patients who spent at least 90% of their admission in a SU compared to  
187 those who did not, were more likely to be admitted to a SU within three hours of arrival to  
188 ED, have a brain scan within 24 hours, be discharged from the hospital on the same day they  
189 were discharged from the SU (Table 1), be assessed for rehabilitation by a physiotherapist

190 within 48 hours of admission and have rehabilitation therapy commenced within 48 hours of  
 191 their initial assessment (Supplemental Table 3).

192 Patients who spent at least 90% of their admission in a SU had a shorter median time  
 193 (hours) from arrival to the ED to admission on a SU compared to those who spent less than  
 194 90% of their admission in a SU (median time 6 hours, Q1: 4, Q3: 10 versus median time 17  
 195 hours, Q1: 6, Q3: 35;  $p < 0.001$ ).

196 **Table 1. Characteristics of patients with stroke who spent at least 90% and those who**  
 197 **spent less than 90% of admission in a stroke unit**

| Spent at least 90% of admission in a SU | Yes<br>(N= 1687)<br>n (%) | No<br>(N=968)<br>n (%) | p-value |
|-----------------------------------------|---------------------------|------------------------|---------|
| Patient characteristics                 |                           |                        |         |
| Age, median (Q1, Q3) <sup>a</sup>       | 75 (65, 84)               | 77 (66, 85)            | 0.006   |
| Male                                    | 936 (55)                  | 537 (55)               | 0.99    |
| Independent prior to stroke (mRS 0–2)   | 1401 (83)                 | 810 (84)               | 0.68    |
| In hospital stroke                      | 26 (2)                    | 37 (4)                 | <0.001  |
| Stroke type                             |                           |                        |         |
| Ischemic stroke                         | 1426 (85)                 | 805 (83)               | 0.36    |
| Hemorrhagic stroke                      | 162 (10)                  | 114 (12)               | 0.08    |
| Unknown stroke type                     | 99 (6)                    | 49 (5)                 | 0.38    |
| Stroke severity <sup>b</sup>            |                           |                        |         |
| Arm weakness on admission               | 1030 (62)                 | 592 (63)               | 0.82    |
| Impaired speech on admission            | 987 (60)                  | 554 (59)               | 0.52    |
| Unable to walk on admission             | 862 (52)                  | 543 (57)               | 0.005   |
| Incontinence at 72 hours of admission   | 488 (30)                  | 340 (36)               | 0.001   |
| History of comorbidities                |                           |                        |         |
| Atrial fibrillation <sup>c</sup>        | 418 (28)                  | 276 (33)               | 0.01    |
| Ischemic heart disease <sup>c</sup>     | 396 (27)                  | 254 (30)               | 0.05    |
| Previous stroke or TIA <sup>d</sup>     | 513 (34)                  | 277 (32)               | 0.49    |
| Clinical processes of care              |                           |                        |         |
| Transferred to SU within 3 hours of ED  |                           |                        |         |

| <b>Spent at least 90% of admission in a SU</b>                    | <b>Yes<br/>(N= 1687)<br/>n (%)</b> | <b>No<br/>(N=968)<br/>n (%)</b> | <b>p-value</b> |
|-------------------------------------------------------------------|------------------------------------|---------------------------------|----------------|
| arrival <sup>c</sup>                                              | 229 (16)                           | 52 (6)                          | <0.001         |
| Transferred to SU within 24 hours of ED arrival <sup>c</sup>      | 1406 (95)                          | 516 (62)                        | <0.001         |
| Brain scan within 24 hrs of ED arrival <sup>c</sup>               | 1329 (97)                          | 722 (95)                        | 0.01           |
| Date of discharge from SU same as date of discharge from hospital | 1567 (99)                          | 456 (52)                        | <0.001         |
| <b>Organizational characteristics</b>                             |                                    |                                 |                |
| Metropolitan hospital                                             | 1634 (97)                          | 955 (99)                        | 0.004          |
| Private hospital                                                  | 116 (7)                            | 94 (10)                         | 0.01           |
| Stroke care coordinator present                                   | 1030 (61)                          | 550 (57)                        | 0.03           |
| Access to onsite neurosurgery                                     | 566 (34)                           | 402 (42)                        | <0.001         |
| Stroke team involved in quality improvement in last 2 years       | 1507 (89)                          | 831 (86)                        | 0.008          |
| Access to early supported discharge team                          | 229 (14)                           | 102 (11)                        | 0.02           |
| Regular multi-disciplinary team meetings                          | 1659 (98)                          | 941 (97)                        | 0.05           |
| <b>Number of beds on SU</b>                                       |                                    |                                 |                |
| <5                                                                | 752 (45)                           | 464 (48)                        | 0.001          |
| 5-9                                                               | 462 (27)                           | 307 (32)                        |                |
| ≥10                                                               | 473 (28)                           | 197 (20)                        |                |
| Stroke admissions last year ≥100                                  | 1563 (93)                          | 916 (95)                        | 0.05           |
| Stroke specialist research nurse involved with treatment          | 319 (19)                           | 140 (14)                        | 0.004          |
| Access to ongoing inpatient rehabilitation                        | 1554 (92)                          | 916 (95)                        | 0.01           |
| <b>In-hospital outcomes</b>                                       |                                    |                                 |                |
| Any severe complication <sup>f</sup>                              | 133 (8)                            | 129 (14)                        | <0.001         |
| Independent on discharge (mRS 0-2)                                | 845 (54)                           | 408 (47)                        | 0.002          |
| Died in hospital                                                  | 107 (6)                            | 95 (10)                         | 0.001          |
| <b>Discharge destination (survivors)</b>                          |                                    |                                 |                |
| Private residence                                                 | 869 (55)                           | 453 (52)                        | 0.14           |

| Spent at least 90% of admission in a SU | Yes       | No       | p-value |
|-----------------------------------------|-----------|----------|---------|
|                                         | (N= 1687) | (N=968)  |         |
|                                         | n (%)     | n (%)    |         |
| Residential aged care facility          | 74 (5)    | 77 (9)   | <0.001  |
| Inpatient rehabilitation                | 487 (31)  | 268 (31) | 0.95    |
| Other hospital ward                     | 122 (8)   | 54 (6)   | 0.16    |
| Other                                   | 28 (2)    | 21 (2)   | 0.28    |

198 Q1: 1st quartile; Q3: 3rd quartile; ED: emergency department; SU: stroke unit; mRS:  
 199 modified Rankin scale. TIA: transient ischemic attack; <sup>a</sup><1% unknown/not documented data;  
 200 <sup>b</sup>1-5% unknown/not documented data; <sup>c</sup>11-15% unknown/not documented data; <sup>d</sup>6-10%  
 201 unknown/not documented data; <sup>e</sup>16-20% unknown/not documented data; <sup>f</sup>a complication  
 202 considered incapacitating, life threatening and one that prolongs hospital admission e.g.  
 203 pneumonia, falls, fever, urinary tract infection, seizures, deep vein thrombosis etc.

204

## 205 In-hospital outcomes and complications

206 Complications such as aspiration pneumonia, fever, urinary tract infections, falls,  
 207 stroke progression and seizures were less common in patients who spent at least 90% of their  
 208 admission in a SU compared to those who spent less time in a SU (Fig 1).

209

210 The median LOS (days) in the hospital for patients who spent at least 90% of their  
 211 admission in a SU was significantly shorter than those who spent less than 90% of their  
 212 admission in a SU (median LOS 4, Q1: 3, Q3: 8 versus median LOS 7, Q1: 4, Q3: 13;  
 213  $p < 0.001$ ). Patients who spent at least 90% of their admission in a SU were more likely to be  
 214 independent on discharge and less likely to have any severe complication or die in the  
 215 hospital (Table 1).

216 On adjustment for confounding variables, no differences were detected in  
 217 independence at discharge or death between the two groups (Table 2). However, patients who  
 218 spent at least 90% of their admission in a SU were 0.60 times less likely to have any severe  
 219 complication and 0.59 times less likely to be discharged to a residential aged care facility  
 220 than those who spent less than 90% of admission in a SU (Table 2). Median LOS for patients  
 221 who spent at least 90% of their admission in a SU was two days shorter than for those who  
 222 did not.

223 **Table 2. Adjusted odds ratios/coefficients for in-hospital outcomes for patients who**  
 224 **spent at least 90% of their admission in a stroke unit**

| Model | Outcome                                      | aOR <sup>a</sup>               | 95% CI        | p value        |
|-------|----------------------------------------------|--------------------------------|---------------|----------------|
| 1.    | Any severe complication <sup>b</sup>         | 0.60                           | 0.43, 0.84    | 0.003          |
| 2.    | Independent on discharge (mRS 0-2)           | 1.19                           | 0.92, 1.53    | 0.19           |
| 3.    | Died                                         | 0.72                           | 0.49, 1.06    | 0.09           |
| 4.    | Discharged to private residence              | 1.05                           | 0.84, 1.32    | 0.67           |
| 5.    | Discharged to inpatient rehabilitation       | 0.97                           | 0.76, 1.23    | 0.79           |
| 6.    | Discharged to residential aged care facility | 0.59                           | 0.38, 0.94    | 0.03           |
|       |                                              | <b>Coefficient<sup>a</sup></b> | <b>95% CI</b> | <b>p value</b> |
| 7.    | Length of stay (discharged)                  | -2.77                          | -3.45, -2.10  | <0.001         |
| 8.    | Length of stay (died)                        | -1.33                          | -5.14, 2.48   | 0.49           |
| 9.    | Length of stay (discharged + died)           | -2.88                          | -3.42, -2.35  | <0.001         |

225 aOR: adjusted odds ratio; CI: confidence interval. <sup>a</sup>Models adjusted for age, sex, premorbid  
 226 function, stroke type, stroke severity and past history of atrial fibrillation. <sup>b</sup>a complication  
 227 considered incapacitating, life threatening and one that prolongs hospital admission e.g.  
 228 pneumonia, falls, fever, urinary tract infection, seizures, deep vein thrombosis etc.

1  
2  
3 229 Sensitivity analyses, including other cut offs for percentage of admission spent in a  
4  
5 230 SU (e.g.  $\geq 50$  to  $< 60$ ,  $\geq 60$  to  $< 70$ ,  $\geq 70$  to  $< 80$ ,  $\geq 80$  to  $< 90$ ), provided evidence of a potential  
6  
7 231 dose effect between occurrence of any severe complications and percentage of admission  
8  
9 232 spent in a SU. In this analysis, in comparison to other cut offs of percentage of admission  
10  
11 233 spent in a SU, spending at least 90% of admission in a SU was associated with fewer severe  
12  
13 234 complications than spending less than 50% of admission in a SU ( $p < 0.001$ ; Supplemental  
14  
15  
16 235 Table 4).

### 236 **Organizational characteristics**

237 Hospitals with onsite neurosurgery services, located in metropolitan areas or those  
238 that were private less often kept their patients in the SU for at least 90% of their admission  
239 (Table 1, Supplemental Table 2). Features of hospitals that were able to provide access to the  
240 SU for at least 90% of the patient's admission included those with: at least 10 beds in a SU, a  
241 SU coordinator, access to early supported discharge team, a stroke specialist research nurse  
242 involved in treatment and those in which the stroke team was involved in quality  
243 improvement in the previous two years (Table 1).

### 244 **Factors associated with spending at least 90% of admission in a** 245 **SU**

246 In multivariable analysis, similar factors remained relevant for likelihood of spending  
247 at least 90% of admission in a SU (Table 3). For instance, patients who were admitted to a  
248 SU within three hours of arrival to the ED were three times more likely to spend at least 90%  
249 of their admission in a SU compared to those who were admitted after three hours of arrival  
250 to the ED (Table 3). This finding was also similar for patients admitted in a SU within 24  
251 hours of arrival to the ED (aOR: 26.17, 95% CI: 17.08, 40.09). Patients who were admitted to  
252 a hospital with at least 10 beds on the SU were more likely to spend at least 90% of

253 admission in a SU compared to those admitted to a hospital with less than five beds on the  
254 SU.

255 **Table 3. Factors associated with patients with stroke spending at least 90% of their**  
256 **admission in a stroke unit**

| Factors                                                     | OR <sup>a</sup> | 95% CI     | p value |
|-------------------------------------------------------------|-----------------|------------|---------|
| Age                                                         |                 |            |         |
| <65                                                         | 1.00            |            |         |
| 65-74                                                       | 1.11            | 0.78, 1.59 | 0.56    |
| 75-84                                                       | 0.94            | 0.67, 1.33 | 0.73    |
| ≥85                                                         | 0.92            | 0.63, 1.35 | 0.68    |
| Unable to walk on admission                                 | 0.75            | 0.57, 0.99 | 0.04    |
| Incontinent at 72 hours of admission                        | 0.84            | 0.63, 1.12 | 0.24    |
| History of atrial fibrillation                              | 1.00            | 0.76, 1.33 | 0.98    |
| History of ischemic heart disease                           | 0.87            | 0.66, 1.13 | 0.30    |
| Any severe complication <sup>b</sup>                        | 0.64            | 0.43, 0.96 | 0.03    |
| Stroke occurred while patient was in hospital               | 0.21            | 0.08, 0.56 | 0.002   |
| Transferred to SU within 3 hours of ED arrival              | 3.41            | 2.14, 5.42 | <0.001  |
| Brain scan assessment within 24 hrs of ED arrival           | 2.03            | 1.08, 3.81 | 0.03    |
| Treated in a metropolitan hospital                          | 0.70            | 0.13, 3.78 | 0.68    |
| Treated in a private hospital                               | 0.77            | 0.33, 1.80 | 0.55    |
| Stroke care coordinator present                             | 1.42            | 0.91, 2.22 | 0.12    |
| Treated in a hospital with onsite neurosurgery              | 0.49            | 0.30, 0.80 | 0.005   |
| Stroke team involved in quality improvement in last 2 years | 1.19            | 0.62, 2.31 | 0.60    |
| Access to early supported discharge team                    | 1.66            | 0.83, 3.29 | 0.15    |
| Regular multi-disciplinary team meetings                    | 1.51            | 0.36, 6.42 | 0.57    |
| Number of beds on SU                                        |                 |            |         |
| <5                                                          | 1.00            |            |         |
| 5-9                                                         | 1.25            | 0.75, 2.09 | 0.39    |
| ≥10                                                         | 1.91            | 1.08, 3.35 | 0.03    |
| Stroke admissions last year ≥100                            | 0.55            | 0.22, 1.33 | 0.18    |
| Stroke specialist research nurse involved with treatment    | 1.52            | 0.80, 2.91 | 0.20    |
| Access to ongoing inpatient rehabilitation                  | 1.02            | 0.38, 2.69 | 0.97    |



1  
2  
3 257 OR: odds ratio; CI: confidence interval; ED: emergency department; SU: stroke unit. <sup>a</sup>  
4  
5 258 Multivariable model adjusted for all factors listed in table; level was hospital. <sup>b a</sup>  
6  
7 259 complication considered incapacitating, life threatening and one that prolongs hospital  
8  
9 260 admission e.g. pneumonia, falls, fever, urinary tract infection, seizures, deep vein thrombosis  
10  
11 261 etc.

## 14 262 **Discussion**

16  
17 263 To our knowledge, this is the first study to describe whether the recommendation for  
18  
19 264 patients with stroke to spend at least 90% of their admission in a SU is a relevant indicator of  
20  
21 265 high quality stroke care. We demonstrated that patients who spent at least 90% of their  
22  
23 266 admission in a SU had a shorter LOS, experienced fewer severe complications and were less  
24  
25 267 often discharged to a residential aged care facility. Spending at least 90% of admission in a  
26  
27 268 SU was associated with fewer severe complications compared to lower proportions of time  
28  
29 269 spent in a SU and these data provide support for the 90% benchmark. While results are based  
30  
31 270 on stroke care provided in Australian hospitals, these findings are important for promoting  
32  
33 271 and ensuring that patients with stroke spend most of their acute hospital stay in a SU.

34  
35 272 While researchers have demonstrated that management of patients in a SU is  
36  
37 273 associated with a reduction in length of hospital stay compared to other wards,<sup>13, 14</sup> our  
38  
39 274 findings have further demonstrated that length of time spent in a SU may also be important.  
40  
41 275 Given the demands for beds in SUs,<sup>14</sup> the two day reduction in LOS observed in our study is  
42  
43 276 clinically important. Additionally, from an economic perspective, this reduction in LOS  
44  
45 277 translates to potentially large cost-savings.<sup>15</sup> This finding together with other improved  
46  
47 278 outcomes such as the reduced likelihood of severe complications and discharge to residential  
48  
49 279 aged care facility and trend towards reduced mortality for patients who spent at least 90% of  
50  
51  
52  
53  
54  
55  
56  
57  
58  
59  
60

1  
2  
3 280 admission in a SU provide further support for ensuring that all patients with stroke spend  
4  
5 281 most of their acute admission in a SU.

6  
7 282         Given that spending at least 90% of admission in a SU influences outcomes, we have  
8  
9 283 further demonstrated factors that are responsible for achieving this indicator. The main  
10  
11 284 finding is that being admitted to a SU within three hours of arrival to the ED was  
12  
13 285 independently associated with spending at least 90% of admission in a SU. This finding is of  
14  
15 286 great importance because early admission to a SU has also been associated with better  
16  
17 287 recovery.<sup>16</sup> Given evidence that SU care significantly reduces death and disability after  
18  
19 288 stroke,<sup>3,4</sup> and that the clinical guidelines for management of stroke recommend direct or early  
20  
21 289 admission to a SU,<sup>5</sup> our finding provides further evidence that early admission on a SU  
22  
23 290 should be a high priority for clinicians and health administrators. Unfortunately, overall  
24  
25 291 access to SU in different countries remains highly variable. For example, in Australia only 67%  
26  
27 292 of the patients with stroke received SU care in 2015.<sup>7</sup> This is a major difference to countries  
28  
29 293 like the United Kingdom (UK) where 96% of patients received SU care.<sup>8</sup> There is need to  
30  
31 294 improve access as well as timely admission to a SU.

32  
33  
34  
35 295         Additionally, having a brain scan within 24 hours of arrival to the ED was associated  
36  
37 296 with spending at least 90% of admission in a SU. An early brain scan is important for  
38  
39 297 confirming the type of stroke and to exclude stroke mimics, thus enabling commencement of  
40  
41 298 time-dependent therapies.<sup>5</sup> The fact that patients who spent at least 90% of their admission in  
42  
43 299 a SU were more likely to begin rehabilitation therapy within 48 hours of initial assessment  
44  
45 300 highlights the importance of this indicator. These findings provide impetus for early  
46  
47 301 assessment and early admission of all stroke patients onto a SU as this may help to advocate  
48  
49 302 for patients to spend most of their acute hospital stay in a SU.

50  
51  
52 303         Another important finding of this study is that individuals with severe stroke (unable  
53  
54 304 to walk on admission) and those who developed severe complications were less likely to

1  
2  
3 305 spend at least 90% of their admission in a SU. This finding is important given evidence that  
4  
5 306 SU care reduces mortality through prevention and treatment of infection and immobility-  
6  
7 307 related complications.<sup>17</sup> Clinicians should be informed and encouraged to admit early and  
8  
9 308 retain in a SU this group of patients that are at greater risk of poor health outcomes, as they  
10  
11 309 may benefit from the inter-disciplinary treatment approach offered in a SU. Because patients  
12  
13 310 with severe stroke or those with any severe complication were less likely to be treated in a  
14  
15 311 SU, it is possible that these patients may be admitted to other wards such as the intensive care  
16  
17 312 unit (ICU) instead of admission on a SU.

18  
19  
20 313 Having at least 10 beds on the SU was associated with spending at least 90% of  
21  
22 314 admission in a SU and this finding provides a strong argument for capacity building and  
23  
24 315 potential redistribution of resources within hospitals to better support care for patients with  
25  
26 316 stroke where there is the relevant throughput of patients.<sup>7</sup>

27  
28  
29 317 There are some limitations that must be acknowledged. The time for discharge from  
30  
31 318 the SU and hospital was unavailable. Therefore, our analysis was limited to dates which do  
32  
33 319 not provide fine granularity that time would have provided. Also some observations were  
34  
35 320 excluded because of invalid or missing dates. Data on patients' ward of first admission were  
36  
37 321 not collected which precludes us from making definitive conclusions such as whether  
38  
39 322 individuals with severe stroke or who suffer severe complications are admitted or transferred  
40  
41 323 to the ICU or other high dependency units first before admission on a SU or during the acute  
42  
43 324 stay. This would have provided insight to why patients with severe complications were less  
44  
45 325 likely to spend at least 90% of their admission in a SU. Given these limitations and the nature  
46  
47 326 of the study design which precludes us from drawing firm conclusions about temporal  
48  
49 327 relationships, these findings should be interpreted with caution. The above limitations  
50  
51 328 notwithstanding, a strength of our study is the large data set from a wide cross-section of  
52  
53 329 Australian hospitals which provides national representation.  
54  
55  
56  
57  
58  
59  
60

## 330 **Conclusions**

331 Spending at least 90% of time in a SU is a useful measure of care quality and was  
332 associated with better patient outcomes such as shorter LOS, fewer severe complications and  
333 less discharge to aged care facilities. Our findings have important implications for clinical  
334 practice and development of new models of stroke care. While we have achieved direct  
335 access to computed tomography from ambulance arrival with introduction of 'Code Stroke',  
336 <sup>18</sup> consideration of the added benefits for patients of direct admissions to stroke units is  
337 warranted.

## 338 **Acknowledgements**

339 We acknowledge the Stroke Foundation for coordinating this National Stroke Audit  
340 and recognise the AuSDaT tool used to collect these data. We gratefully acknowledge the  
341 hospitals participating in the National Stroke Audit and all the clinicians who contributed to  
342 data collection over the audit cycles.

## 343 **Disclosures**

344 Bruce Campbell and Sandy Middleton are members of the Stroke Foundation Clinical  
345 Council.

## 346 **Funding**

347 This research received no specific grant from any funding agency in the public,  
348 commercial or not-for-profit sectors. The following authors receive Research Fellowship  
349 support from the NHMRC: Dominique Cadilhac (1063761- co-funded Heart Foundation),  
350 Monique Kilkenny (Early Carer Fellowship 1109426),

351

## 352 **Authors and individual contributions**

353 DB: drafting of the manuscript, performed the data analyses and contributed to the interpretation of

354 the data

355 MK: contribution to data analysis methods, manuscript revisions and interpretation of the data

356 TP: contribution to data analysis methods, manuscript revisions and interpretation of the data

357 JK: contribution to data analysis methods, manuscript revisions and interpretation of the data

358 SM: contribution to manuscript revisions

359 BC: contribution to manuscript revisions

360 DC: contribution to the supervision of analysis, interpretation of the data, manuscript revision

361

## 362 **Data Sharing Statement**

363 Contact can be made with the corresponding author for queries relating to unpublished data.

364

365

366

367

368

369

370

## 371 **References**

- 372 1. Feigin VL, Krishnamurthi RV, Parmar P, Norrving B, Mensah GA, Bennett DA, et al.  
373 Update on the global burden of ischemic and hemorrhagic stroke in 1990-2013: The  
374 GBD 2013 study. *Neuroepidemiology*. 2015;45:161-176
- 375 2. Cadilhac DA, Pearce DC, Levi CR, Donnan GA. Improvements in the quality of care  
376 and health outcomes with new stroke care units following implementation of a  
377 clinician-led, health system redesign programme in New South Wales, Australia.  
378 *Qual Saf Health Care*. 2008;17:329-333
- 379 3. Stroke Unit Trialists Collaboration. Organised inpatient (stroke unit) care for stroke.  
380 *Cochrane Database Syst Rev*. 2013:CD000197
- 381 4. Cadilhac D, Andrew N, Lannin N, Middleton S, Levi C, Dewey H, et al. Quality of  
382 acute care and long-term quality of life and survival: The Australian Stroke Clinical  
383 Registry. *Stroke*. 2017;48:1027-1032
- 384 5. National Stroke Foundation. Clinical guidelines for stroke management 2010.  
385 Melbourne. 2010.
- 386 6. Intercollegiate Stroke Working Party. The National Clinical Guidelines for Stroke.  
387 2016
- 388 7. National Stroke Foundation. National Stroke Audit – Acute Services Report 2015.  
389 Melbourne. 2015
- 390 8. Royal College of Physicians. Sentinel Stroke National Audit Programme (SSNAP)  
391 Clinical Audit January-March 2016 Public Report. 2016
- 392 9. von Elm E, Altman DG, Egger M, Pocock SJ, Gøtzsche PC, Vandenbroucke JP, et al.  
393 The strengthening the reporting of observational studies in epidemiology (strobe)  
394 statement: Guidelines for reporting observational studies. *PLoS Med*. 2007;4:e296

- 1  
2  
3 395 10. Harris D, Cadilhac D, Hankey GJ, Hillier S, Kilkenny M, Lalor E. National Stroke  
4  
5 396 Audit: The Australian Experience. *Clin Audit*. 2010;2:25-31  
6  
7 397 11. Counsell C, Dennis M, McDowall M, Warlow C. Predicting outcome after acute and  
8  
9 398 subacute stroke: Development and validation of new prognostic models. *Stroke*.  
10  
11 399 2002;33:1041-1047  
12  
13 400 12. Sim J, Teece L, Dennis MS, Roffe C, Team SOSS. Validation and recalibration of  
14  
15 401 two multivariable prognostic models for survival and independence in acute stroke.  
16  
17 402 *PLoS One*. 2016;11:e0153527  
18  
19 403 13. Zhu HF, Newcommon NN, Cooper ME, Green TL, Seal B, Klein G, et al. Impact of a  
20  
21 404 stroke unit on length of hospital stay and in-hospital case fatality. *Stroke*. 2009;40:18-  
22  
23 405 23  
24  
25 406 14. Cadilhac DA, Purvis T, Kilkenny MF, Longworth M, Mohr K, Pollack M, et al.  
26  
27 407 Evaluation of rural stroke services does implementation of coordinators and pathways  
28  
29 408 improve care in rural hospitals? *Stroke*. 2013;44:2848-2853  
30  
31 409 15. Phillips SJ, Eskes GA, Gubitz GJ, Queen Elizabeth IIHSCAST. Description and  
32  
33 410 evaluation of an acute stroke unit. *CMAJ*. 2002;167:655-660  
34  
35 411 16. Silvestrelli G, Parnetti L, Paciaroni M, Caso V, Corea F, Vitali R, et al. Early  
36  
37 412 admission to stroke unit influences clinical outcome. *Eur. J. Neurol*. 2006;13:250-255  
38  
39 413 17. Govan L, Langhorne P, Weir CJ. Does the prevention of complications explain the  
40  
41 414 survival benefit of organized inpatient (stroke unit) care? - Further analysis of a  
42  
43 415 systematic review. *Stroke*. 2007;38:2536-2540  
44  
45 416 18. Gomez CR, Malkoff MD, Sauer CM, Tulyapronchote R, Burch CM, Banet GA. Code  
46  
47 417 stroke. An attempt to shorten in-hospital therapeutic delays. *Stroke*. 1994;25:1920-  
48  
49 418 1923  
50  
51  
52  
53  
54  
55 419

1  
2  
3 420 **Figure Legend**  
4  
5

6  
7 421 **Figure 1. Differences in complications between patients who spent at least 90% and**  
8  
9 422 **those who spent less than 90% of their admission in a stroke unit.**

10  
11 423 \*significant  $p < 0.05$ ; <sup>a</sup>asymptomatic hemorrhagic transformation.  
12  
13

14  
15 424  
16

17  
18 425  
19

20  
21 426 **Supplemental information**  
22

23 427 Supplemental Table 1. Characteristics of patients with stroke treated in a stroke unit versus  
24 428 those not treated in a stroke unit

25  
26  
27 429 Supplemental Table 2. Characteristics of patients with stroke who spent at least 90% and  
28 430 those who spent less than 90% of admission in a stroke unit

29  
30  
31 431 Supplemental Table 3. Adherence to processes of care for patients who spent at least 90%  
32 432 and those who spent less than 90% of hospital stay in a stroke unit

33  
34  
35 433 Supplemental Table 4. Association between percentages of hospital stay spent in a stroke unit  
36 434 and in-hospital outcomes of patients with stroke  
37  
38

39 435  
40

41 436  
42

43 437  
44

45 438  
46

47 439  
48

49 440  
50  
51  
52  
53  
54  
55  
56  
57  
58  
59  
60



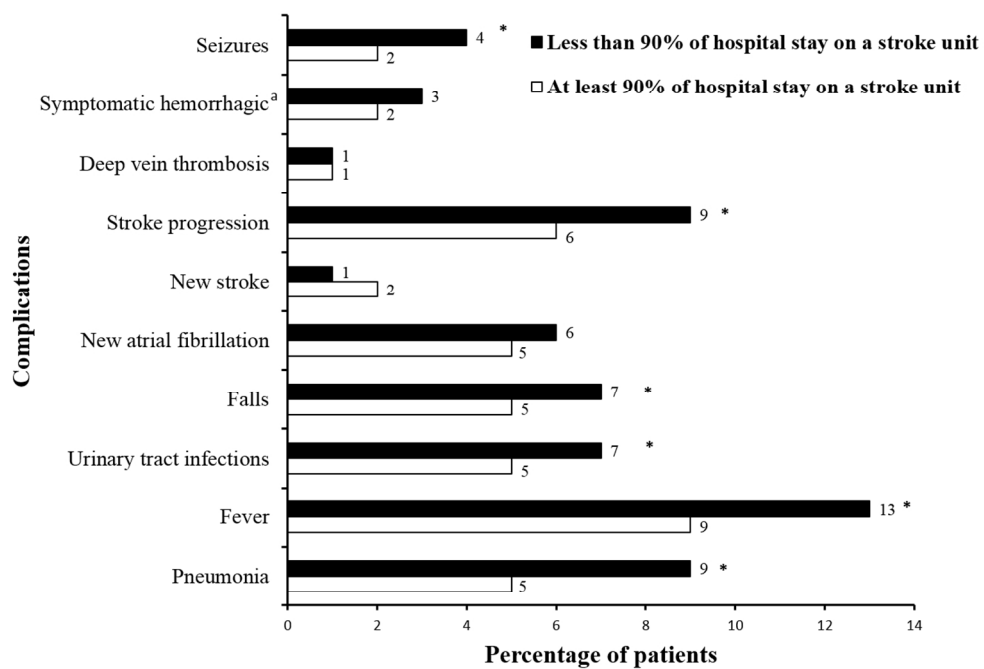

Figure 1. Differences in complications between patients who spent at least 90% and those who spent less than 90% of their admission in a stroke unit

114x80mm (300 x 300 DPI)

**Supplemental Table 1. Characteristics of patients with stroke treated in a stroke unit versus those not treated in a stroke unit**

| <b>Treated in a stroke unit</b>                             | <b>Yes<br/>(N= 2739)<br/>n (%)</b> | <b>No<br/>(N=684)<br/>n (%)</b> | <b>p-value</b>   |
|-------------------------------------------------------------|------------------------------------|---------------------------------|------------------|
| <b>Patient characteristics</b>                              |                                    |                                 |                  |
| Age, median (Q1, Q3)                                        | 76 (65, 84)                        | 77 (65, 86)                     | <b>0.03</b>      |
| Male                                                        | 1530 (56)                          | 347 (51)                        | <b>0.02</b>      |
| Living at home prior to stroke                              | 2522 (92)                          | 586 (86)                        | <b>&lt;0.001</b> |
| Independent prior to stroke (mRS 0–2)                       | 2280 (83)                          | 496 (73)                        | <b>&lt;0.001</b> |
| In hospital stroke                                          | 75 (3)                             | 54 (8)                          | <b>&lt;0.001</b> |
| Stroke type                                                 |                                    |                                 |                  |
| Ischemic stroke                                             | 2302 (84)                          | 449 (66)                        | <b>&lt;0.001</b> |
| Hemorrhagic stroke                                          | 286 (10)                           | 163 (24)                        | <b>&lt;0.001</b> |
| Unknown stroke type                                         | 151 (6)                            | 72 (11)                         | <b>&lt;0.001</b> |
| Stroke severity                                             |                                    |                                 |                  |
| Arm weakness on admission                                   | 1675 (62)                          | 352 (59)                        | 0.18             |
| Impaired speech on admission                                | 1582 (59)                          | 333 (57)                        | 0.43             |
| Unable to walk on admission                                 | 1454 (54)                          | 392 (59)                        | <b>0.02</b>      |
| Incontinence at 72 hours of admission                       | 857 (32)                           | 258 (42)                        | <b>&lt;0.001</b> |
| History of comorbidities                                    |                                    |                                 |                  |
| Atrial fibrillation                                         |                                    |                                 |                  |
| Hypercholesterolemia                                        | 1058 (44)                          | 225 (43)                        | 0.73             |
| Hypertension                                                | 1820 (70)                          | 419 (70)                        | 0.92             |
| Diabetes mellitus                                           | 669 (27)                           | 160 (29)                        | 0.36             |
| Ischemic heart disease                                      | 670 (28)                           | 175 (33)                        | <b>0.02</b>      |
| Previous stroke or TIA                                      | 814 (33)                           | 221 (39)                        | <b>0.007</b>     |
| <b>Organizational characteristics</b>                       |                                    |                                 |                  |
| Metropolitan hospital                                       | 2672 (98)                          | 661 (97)                        | 0.18             |
| Private hospital                                            | 217 (8)                            | 37 (5)                          | <b>0.03</b>      |
| Stroke care coordinator present                             | 1626 (59)                          | 446 (65)                        | <b>0.005</b>     |
| Access to onsite neurosurgery                               | 1000 (37)                          | 210 (31)                        | <b>0.004</b>     |
| Dedicated multi-disciplinary team present                   | 2706 (99)                          | 677 (99)                        | 0.69             |
| ED protocols for rapid triage                               | 2625 (96)                          | 643 (94)                        | <b>0.04</b>      |
| Access to on site MRI within 24 hours                       | 2136 (78)                          | 517 (76)                        | 0.18             |
| Stroke team involved in quality improvement in last 2 years | 2416 (88)                          | 543 (79)                        | <b>&lt;0.001</b> |
| Clinical care pathways for managing stroke present          | 2339 (85)                          | 569 (83)                        | 0.15             |
| Access to early supported discharge team                    | 338 (12)                           | 103 (15)                        | 0.06             |
| Patients given discharge care plan                          | 1275 (47)                          | 347 (51)                        | 0.05             |
| Regular multi-disciplinary team meetings                    | 2683 (98)                          | 665 (97)                        | 0.24             |
| Arrangements with ambulance for rapid transfers             | 1897 (73)                          | 498 (78)                        | <b>0.003</b>     |
| Offering thrombolysis                                       | 2404 (88)                          | 606 (89)                        | 0.55             |
| Program for continuing education of staff                   | 2609 (95)                          | 649 (95)                        | 0.69             |
| Number of beds on SU                                        |                                    |                                 | <b>&lt;0.001</b> |

| <b>Treated in a stroke unit</b>                                                             | <b>Yes<br/>(N= 2739)<br/>n (%)</b> | <b>No<br/>(N=684)<br/>n (%)</b> | <b>p-value</b>   |
|---------------------------------------------------------------------------------------------|------------------------------------|---------------------------------|------------------|
| <5                                                                                          | 1246 (45)                          | 380 (56)                        |                  |
| 5-9                                                                                         | 790 (29)                           | 179 (26)                        |                  |
| ≥10                                                                                         | 703 (26)                           | 125 (18)                        |                  |
| Stroke admissions last year ≥100                                                            | 2558 (93)                          | 602 (88)                        | <b>&lt;0.001</b> |
| CT scanning within 3 hours for all patients                                                 | 2690 (98)                          | 676 (99)                        | 0.26             |
| <b>Clinical processes of care</b>                                                           |                                    |                                 |                  |
| Brain scan within 24 hrs of ED arrival                                                      | 2108 (96)                          | 496 (96)                        | 0.35             |
| Assessment in the ED                                                                        | 1071 (44)                          | 127 (28)                        | <b>&lt;0.001</b> |
| Time-critical therapy                                                                       |                                    |                                 |                  |
| Thrombolysis in ischemic stroke (with exclusions)                                           | 198 (10)                           | 24 (6)                          | <b>0.01</b>      |
| Assessment for rehabilitation by a physiotherapist within 24-48 hours of hospital admission | 1605 (59)                          | 198 (29)                        | <b>&lt;0.001</b> |
| Rehabilitation therapy within 48 hours of initial assessment                                | 1899 (89)                          | 249 (67)                        | <b>&lt;0.001</b> |
| Transition from hospital care                                                               |                                    |                                 |                  |
| Written care plan                                                                           | 1113 (61)                          | 192 (48)                        | <b>&lt;0.001</b> |
| <b>Outcomes</b>                                                                             |                                    |                                 |                  |
| Any severe complication <sup>a</sup>                                                        | 277 (10)                           | 135 (20)                        | <b>&lt;0.001</b> |
| Independent on discharge (mRS 0-2)                                                          | 1285 (51)                          | 263 (51)                        | 0.84             |
| Died in hospital                                                                            | 207 (8)                            | 170 (25)                        | <b>&lt;0.001</b> |
| Discharge destination (survivors)                                                           |                                    |                                 |                  |
| Private residence                                                                           | 1350 (53)                          | 293 (57)                        | 0.13             |
| Residential aged care facility                                                              | 156 (6)                            | 43 (8)                          | 0.07             |
| Inpatient rehabilitation                                                                    | 785 (31)                           | 77 (15)                         | <b>&lt;0.001</b> |
| Other hospital ward                                                                         | 191 (8)                            | 90 (18)                         | <b>&lt;0.001</b> |
| <b>In-hospital complications</b>                                                            |                                    |                                 |                  |
| Aspiration Pneumonia                                                                        | 183 (7)                            | 45 (7)                          | 0.92             |
| Falls                                                                                       | 167 (6)                            | 26 (4)                          | <b>0.02</b>      |
| Fever                                                                                       | 289 (11)                           | 75 (11)                         | 0.75             |
| Urinary tract infections                                                                    | 169 (6)                            | 30 (4)                          | 0.07             |
| New stroke                                                                                  | 47 (2)                             | 38 (6)                          | <b>&lt;0.001</b> |
| Stroke progression                                                                          | 187 (7)                            | 82 (12)                         | <b>&lt;0.001</b> |
| New onset atrial fibrillation                                                               | 155 (6)                            | 28 (4)                          | 0.10             |
| Symptomatic hemorrhagic transformation                                                      | 73 (3)                             | 26 (4)                          | 0.11             |
| Deep vein thrombosis                                                                        | 15 (1)                             | 4 (1)                           | 0.91             |
| Seizures                                                                                    | 67 (2)                             | 34 (5)                          | <b>&lt;0.001</b> |

Q1: 1st quartile; Q3: 3rd quartile; ED: emergency department; SU: stroke unit; mRS: modified Rankin scale. TIA: transient ischaemic attack; MRI: magnetic resonance imaging; <sup>a</sup>a complication considered incapacitating, life threatening and one that prolongs hospital admission and patient acuity including pneumonia, falls, fever, urinary tract infection, seizures, deep vein thrombosis etc.

**Supplemental Table 2. Characteristics of patients with stroke who spent at least 90% and those who spent less than 90% of admission in a stroke unit**

| <b>Spent at least 90% of admission in a stroke unit</b> | <b>Yes<br/>(N= 1687)<br/>n (%)</b> | <b>No<br/>(N=968)<br/>n (%)</b> | <b>p-value</b> |
|---------------------------------------------------------|------------------------------------|---------------------------------|----------------|
| <b>Patient characteristics</b>                          |                                    |                                 |                |
| Living at home prior to stroke                          | 1543 (91)                          | 898 (93)                        | 0.24           |
| Arrived by ambulance <sup>a</sup>                       | 1145 (76)                          | 678 (79)                        | 0.21           |
| History of comorbidities                                |                                    |                                 |                |
| Hypercholesterolemia <sup>a</sup>                       | 653 (44)                           | 366 (43)                        | 0.69           |
| Hypertension <sup>b</sup>                               | 1123 (70)                          | 644 (71)                        | 0.76           |
| Diabetes mellitus <sup>c</sup>                          | 401 (26)                           | 253 (29)                        | 0.14           |
| Previous stroke or TIA <sup>c</sup>                     | 513 (34)                           | 277 (32)                        | 0.49           |
| Clinical processes of care                              |                                    |                                 |                |
| Brain scan within 3 hrs of ED arrival <sup>d</sup>      | 1053 (77)                          | 567 (75)                        | 0.24           |
| <b>Organizational characteristics</b>                   |                                    |                                 |                |
| Dedicated multi-disciplinary team present               | 1669 (99)                          | 953 (98)                        | 0.28           |
| ED protocols for rapid triage                           | 1626 (96)                          | 919 (95)                        | 0.07           |
| Access to on site MRI within 24 hours                   | 1306 (77)                          | 765 (79)                        | 0.33           |
| Clinical care pathways for managing stroke present      | 1452 (86)                          | 827 (85)                        | 0.65           |
| Patients given discharge care plan                      | 772 (46)                           | 464 (48)                        | 0.28           |
| Arrangements with ambulance for rapid transfers         | 1163 (73)                          | 675 (73)                        | 0.90           |
| Offering thrombolysis                                   | 1490 (88)                          | 838 (87)                        | 0.19           |
| Standardized processes to assess rehabilitation         | 1346 (80)                          | 749 (77)                        | 0.14           |
| Program for continuing education of staff               | 1603 (95)                          | 926 (96)                        | 0.46           |
| Neurologist involved in stroke management               | 1224 (73)                          | 720 (74)                        | 0.31           |
| CT scanning within 3 hours for all patients             | 1651 (98)                          | 955 (99)                        | 0.15           |

ED: emergency department; TIA: transient ischemic attack; CT: computed tomography; <sup>a</sup>11-15% unknown/not documented data; <sup>b</sup>1-5% unknown/not documented data; <sup>c</sup>6-10% unknown/not documented data; <sup>d</sup>16-20% unknown/not documented data.

**Supplemental Table 3. Adherence to processes of care for patients who spent at least 90% and those who spent less than 90% of hospital stay in a stroke unit**

| Spent at least 90% of hospital stay in a stroke unit                                                     | Yes<br>(N= 1687)<br>n (%) | No (N=968)<br>n (%) | p-value          |
|----------------------------------------------------------------------------------------------------------|---------------------------|---------------------|------------------|
| Early assessment                                                                                         |                           |                     |                  |
| Assessment in the ED                                                                                     | 675 (44)                  | 367 (43)            | 0.79             |
| Time-critical therapy                                                                                    |                           |                     |                  |
| Transport by ambulance to hospital able to provide thrombolysis                                          | 1015 (76)                 | 597 (79)            | 0.23             |
| Thrombolysis in ischemic stroke (with exclusions) <sup>a</sup>                                           | 99 (8)                    | 94 (13)             | <b>&lt;0.001</b> |
| Thrombolysis in ischemic stroke for those who arrive within 4.5 hours of symptom onset                   | 88 (25)                   | 83 (36)             | <b>0.003</b>     |
| Thrombolysis within 60 minutes of hospital arrival                                                       | 32 (32)                   | 20 (21)             | 0.08             |
| Time (median) from onset of symptoms to thrombolysis (Q1,Q3)                                             | 2.8 (1.9, 3.7)            | 3 (2.3, 3.8)        | 0.10             |
| Early rehabilitation                                                                                     |                           |                     |                  |
| Assessment for rehabilitation by a physiotherapist within 24-48 hours of hospital admission <sup>b</sup> | 1185 (70)                 | 643 (66)            | <b>0.04</b>      |
| Rehabilitation therapy within 48 hours of initial assessment                                             | 1161 (90)                 | 673 (86)            | <b>0.01</b>      |
| Treatment for a rehabilitation goal commencing during an acute hospital admission                        | 1256 (94)                 | 738 (92)            | 0.14             |
| Minimising risk of another stroke                                                                        |                           |                     |                  |
| Discharge on antihypertensive medication <sup>c</sup>                                                    | 701 (75)                  | 404 (77)            | 0.54             |
| Discharge on statin, antihypertensive and antithrombotic medications (ischemic stroke) <sup>d</sup>      | 526 (66)                  | 285 (66)            | 0.84             |
| Discharge on oral anticoagulants for atrial fibrillation (ischemic stroke)                               | 144 (68)                  | 87 (63)             | 0.38             |
| Risk factor modification advice before leaving hospital                                                  | 597 (61)                  | 353 (64)            | 0.32             |
| Carer training and support                                                                               |                           |                     |                  |
| Carer support needs assessment                                                                           | 113 (64)                  | 79 (72)             | 0.13             |
| Carer training                                                                                           | 99 (55)                   | 58 (56)             | 0.87             |
| Transition from hospital care                                                                            |                           |                     |                  |
| Written care plan                                                                                        | 699 (62)                  | 377 (59)            | 0.16             |

ED: emergency department; Q1: 1st quartile; Q3: 3rd quartile; SU: stroke unit; <sup>a</sup> patients with premorbid functional impairment, recent surgery, major comorbidity, warfarin with INR>1.7, rapidly improving, imaging showing spontaneous reperfusion, other contraindication; <sup>b</sup> recorded as within 48 hours; <sup>c</sup>excludes those contraindicated to treatment; <sup>d</sup> excludes those where treatment was contraindicated or futile, or the patient refused.

**Supplemental Table 4. Association between percentages of hospital stay spent in a stroke unit and in-hospital outcomes of patients with stroke**

| Model | Percentage of time spent in a SU (%)                       | aOR <sup>a</sup> | 95% CI               | P-value          |
|-------|------------------------------------------------------------|------------------|----------------------|------------------|
| 1     | Any severe Complications <sup>b</sup>                      |                  |                      |                  |
|       | < 50                                                       | 1                |                      |                  |
|       | ≥50 to <60                                                 | 1.35             | (0.68, 2.69)         | 0.40             |
|       | ≥60 to <70                                                 | 0.56             | (0.23, 1.36)         | 0.20             |
|       | ≥70 to <80                                                 | 0.54             | (0.23, 1.26)         | 0.15             |
|       | ≥80 to <90                                                 | 0.51             | (0.25, 1.05)         | 0.07             |
|       | ≥90                                                        | <b>0.47</b>      | <b>(0.30, 0.74)</b>  | <b>0.001</b>     |
| 2     | LOS less than or equal to median LOS (5 days) - discharged |                  |                      |                  |
|       | < 50                                                       | 1                |                      |                  |
|       | ≥50 to <60                                                 | <b>7.31</b>      | <b>(4.12, 12.97)</b> | <b>&lt;0.001</b> |
|       | ≥60 to <70                                                 | <b>9.15</b>      | <b>(5.14, 16.27)</b> | <b>&lt;0.001</b> |
|       | ≥70 to <80                                                 | <b>6.31</b>      | <b>(3.52, 11.31)</b> | <b>&lt;0.001</b> |
|       | ≥80 to <90                                                 | <b>2.27</b>      | <b>(1.28, 4.02)</b>  | <b>0.005</b>     |
|       | ≥90                                                        | <b>9.71</b>      | <b>(6.42, 14.69)</b> | <b>&lt;0.001</b> |
| 3     | Independent at discharge (mRS 0-2)                         |                  |                      |                  |
|       | < 50                                                       | 1                |                      |                  |
|       | ≥50 to <60                                                 | 1.67             | (0.90, 3.10)         | 0.10             |
|       | ≥60 to <70                                                 | 1.61             | (0.89, 2.91)         | 0.11             |
|       | ≥70 to <80                                                 | <b>2.02</b>      | <b>(1.08, 3.79)</b>  | <b>0.03</b>      |
|       | ≥80 to <90                                                 | 1.07             | (0.60, 1.90)         | 0.82             |
|       | ≥90                                                        | <b>1.57</b>      | <b>(1.07, 2.28)</b>  | <b>0.02</b>      |

SU: stroke unit; aOR: adjusted odds ratio; CI: confidence interval; LOS: length of stay; mRS: modified Rankin scale. <sup>a</sup>Models adjusted for age, gender, pre-morbid function, stroke type, stroke severity and past history of atrial fibrillation. <sup>b</sup>a complication considered incapacitating, life threatening and one that prolongs hospital admission and patient acuity including pneumonia, falls, fever, urinary tract infection, seizures, deep vein thrombosis etc.

STROBE Statement—Checklist of items that should be included in reports of *cross-sectional studies*

|                              | <b>Item No</b> | <b>Recommendation</b>                                                                                                                                                                                                                                                                                                                                                                                                                             |
|------------------------------|----------------|---------------------------------------------------------------------------------------------------------------------------------------------------------------------------------------------------------------------------------------------------------------------------------------------------------------------------------------------------------------------------------------------------------------------------------------------------|
| <b>Title and abstract</b>    | 1              | (a) Indicate the study's design with a commonly used term in the title or the abstract<br>(b) Provide in the abstract an informative and balanced summary of what was done and what was found ( <b>Page 2</b> )                                                                                                                                                                                                                                   |
| <b>Introduction</b>          |                |                                                                                                                                                                                                                                                                                                                                                                                                                                                   |
| Background/rationale         | 2              | Explain the scientific background and rationale for the investigation being reported ( <b>Page 4</b> )                                                                                                                                                                                                                                                                                                                                            |
| Objectives                   | 3              | State specific objectives, including any prespecified hypotheses ( <b>Page 4</b> )                                                                                                                                                                                                                                                                                                                                                                |
| <b>Methods</b>               |                |                                                                                                                                                                                                                                                                                                                                                                                                                                                   |
| Study design                 | 4              | Present key elements of study design early in the paper ( <b>Page 4</b> )                                                                                                                                                                                                                                                                                                                                                                         |
| Setting                      | 5              | Describe the setting, locations, and relevant dates, including periods of recruitment, exposure, follow-up, and data collection ( <b>Page 5</b> )                                                                                                                                                                                                                                                                                                 |
| Participants                 | 6              | (a) Give the eligibility criteria, and the sources and methods of selection of participants ( <b>Page 5</b> )                                                                                                                                                                                                                                                                                                                                     |
| Variables                    | 7              | Clearly define all outcomes, exposures, predictors, potential confounders, and effect modifiers. Give diagnostic criteria, if applicable ( <b>Page 5 &amp; 6</b> )                                                                                                                                                                                                                                                                                |
| Data sources/<br>measurement | 8*             | For each variable of interest, give sources of data and details of methods of assessment (measurement). Describe comparability of assessment methods if there is more than one group ( <b>Page 5 &amp; 6</b> )                                                                                                                                                                                                                                    |
| Bias                         | 9              | Describe any efforts to address potential sources of bias ( <b>Page 6 &amp; 7</b> )                                                                                                                                                                                                                                                                                                                                                               |
| Study size                   | 10             | Explain how the study size was arrived at ( <b>Page 5</b> )                                                                                                                                                                                                                                                                                                                                                                                       |
| Quantitative variables       | 11             | Explain how quantitative variables were handled in the analyses. If applicable, describe which groupings were chosen and why ( <b>Page 5 &amp; 6</b> )                                                                                                                                                                                                                                                                                            |
| Statistical methods          | 12             | (a) Describe all statistical methods, including those used to control for confounding ( <b>Page 6 &amp; 7</b> )<br>(b) Describe any methods used to examine subgroups and interactions ( <b>Page 6 &amp; 7</b> )<br>(c) Explain how missing data were addressed ( <b>Page 6</b> )<br>(d) If applicable, describe analytical methods taking account of sampling strategy ( <b>N/A</b> )<br>(e) Describe any sensitivity analyses ( <b>Page 7</b> ) |
| <b>Results</b>               |                |                                                                                                                                                                                                                                                                                                                                                                                                                                                   |
| Participants                 | 13*            | (a) Report numbers of individuals at each stage of study—eg numbers potentially eligible, examined for eligibility, confirmed eligible, included in the study, completing follow-up, and analysed ( <b>Page 8</b> )<br>(b) Give reasons for non-participation at each stage ( <b>N/A</b> )<br>(c) Consider use of a flow diagram ( <b>N/A</b> )                                                                                                   |
| Descriptive data             | 14*            | (a) Give characteristics of study participants (eg demographic, clinical, social) and information on exposures and potential confounders ( <b>Page 8, Table 1</b> )<br>(b) Indicate number of participants with missing data for each variable of interest ( <b>Table 1</b> )                                                                                                                                                                     |
| Outcome data                 | 15*            | Report numbers of outcome events or summary measures ( <b>Page 11, 12, Table 2, Table 3</b> )                                                                                                                                                                                                                                                                                                                                                     |
| Main results                 | 16             | (a) Give unadjusted estimates and, if applicable, confounder-adjusted estimates and their precision (eg, 95% confidence interval). Make clear which confounders were adjusted for and why they were included ( <b>Page 11, Page 12, Page 13, Table 2,</b>                                                                                                                                                                                         |

**Table 3)**

|                          |    |                                                                                                                                                                                               |
|--------------------------|----|-----------------------------------------------------------------------------------------------------------------------------------------------------------------------------------------------|
|                          |    | (b) Report category boundaries when continuous variables were categorized (N/A)                                                                                                               |
|                          |    | (c) If relevant, consider translating estimates of relative risk into absolute risk for a meaningful time period (N/A)                                                                        |
| Other analyses           | 17 | Report other analyses done—eg analyses of subgroups and interactions, and sensitivity analyses (Page 13, Supplemental Table 4)                                                                |
| <b>Discussion</b>        |    |                                                                                                                                                                                               |
| Key results              | 18 | Summarise key results with reference to study objectives (Page 15)                                                                                                                            |
| Limitations              | 19 | Discuss limitations of the study, taking into account sources of potential bias or imprecision. Discuss both direction and magnitude of any potential bias (Page 17)                          |
| Interpretation           | 20 | Give a cautious overall interpretation of results considering objectives, limitations, multiplicity of analyses, results from similar studies, and other relevant evidence (Page 15, Page 17) |
| Generalisability         | 21 | Discuss the generalisability (external validity) of the study results (Page 15)                                                                                                               |
| <b>Other information</b> |    |                                                                                                                                                                                               |
| Funding                  | 22 | Give the source of funding and the role of the funders for the present study and, if applicable, for the original study on which the present article is based (Page 18)                       |

\*Give information separately for exposed and unexposed groups.

**Note:** An Explanation and Elaboration article discusses each checklist item and gives methodological background and published examples of transparent reporting. The STROBE checklist is best used in conjunction with this article (freely available on the Web sites of PLoS Medicine at <http://www.plosmedicine.org/>, Annals of Internal Medicine at <http://www.annals.org/>, and Epidemiology at <http://www.epidem.com/>). Information on the STROBE Initiative is available at [www.strobe-statement.org](http://www.strobe-statement.org).



# BMJ Open

## Is length of time in a stroke unit associated with better outcomes for patients with stroke in Australia? An observational study

|                                 |                                                                                                                                                                                                                                                                                                                                                                                                                                                                                                                                                                                                                                                                                                                                                                                                                                                                                                                                                                                                                                                                                                                                                                                                                                                                                                                             |
|---------------------------------|-----------------------------------------------------------------------------------------------------------------------------------------------------------------------------------------------------------------------------------------------------------------------------------------------------------------------------------------------------------------------------------------------------------------------------------------------------------------------------------------------------------------------------------------------------------------------------------------------------------------------------------------------------------------------------------------------------------------------------------------------------------------------------------------------------------------------------------------------------------------------------------------------------------------------------------------------------------------------------------------------------------------------------------------------------------------------------------------------------------------------------------------------------------------------------------------------------------------------------------------------------------------------------------------------------------------------------|
| Journal:                        | <i>BMJ Open</i>                                                                                                                                                                                                                                                                                                                                                                                                                                                                                                                                                                                                                                                                                                                                                                                                                                                                                                                                                                                                                                                                                                                                                                                                                                                                                                             |
| Manuscript ID                   | bmjopen-2018-022536.R1                                                                                                                                                                                                                                                                                                                                                                                                                                                                                                                                                                                                                                                                                                                                                                                                                                                                                                                                                                                                                                                                                                                                                                                                                                                                                                      |
| Article Type:                   | Research                                                                                                                                                                                                                                                                                                                                                                                                                                                                                                                                                                                                                                                                                                                                                                                                                                                                                                                                                                                                                                                                                                                                                                                                                                                                                                                    |
| Date Submitted by the Author:   | 06-Jun-2018                                                                                                                                                                                                                                                                                                                                                                                                                                                                                                                                                                                                                                                                                                                                                                                                                                                                                                                                                                                                                                                                                                                                                                                                                                                                                                                 |
| Complete List of Authors:       | <p>Busingye, Doreen ; Monash University, Translational Public Health and Evaluation Division, Stroke and Ageing Research, School of Clinical Sciences at Monash Health</p> <p>Kilkenny, Monique; Monash University, Translational Public Health and Evaluation Division, Stroke and Ageing Research, School of Clinical Sciences at Monash Health; The Florey Institute of Neuroscience and Mental Health, Stroke Division</p> <p>Purvis, Tara; Monash University, Translational Public Health and Evaluation Division, Stroke and Ageing Research, School of Clinical Sciences at Monash Health</p> <p>Kim, Joosup; Monash University, Translational Public Health and Evaluation Division, Stroke and Ageing Research, School of Clinical Sciences at Monash Health; The Florey Institute of Neuroscience and Mental Health, Stroke Division</p> <p>Middleton, Sandy; Nursing Research Institute, St Vincent's Health Australia (Syd) and Australian Catholic Univeristy</p> <p>Campbell, Bruce; Royal Melbourne Hospital, Department of Medicine and Neurology</p> <p>Cadilhac, Dominique; Monash University, Translational Public Health and Evaluation Division, Stroke and Ageing Research, School of Clinical Sciences at Monash Health; The Florey Institute of Neuroscience and Mental Health, Stroke Division</p> |
| <b>Primary Subject Heading</b>: | Neurology                                                                                                                                                                                                                                                                                                                                                                                                                                                                                                                                                                                                                                                                                                                                                                                                                                                                                                                                                                                                                                                                                                                                                                                                                                                                                                                   |
| Secondary Subject Heading:      | Health services research                                                                                                                                                                                                                                                                                                                                                                                                                                                                                                                                                                                                                                                                                                                                                                                                                                                                                                                                                                                                                                                                                                                                                                                                                                                                                                    |
| Keywords:                       | Stroke < NEUROLOGY, Quality in health care < HEALTH SERVICES ADMINISTRATION & MANAGEMENT, health services reserach, outcomes                                                                                                                                                                                                                                                                                                                                                                                                                                                                                                                                                                                                                                                                                                                                                                                                                                                                                                                                                                                                                                                                                                                                                                                                |
|                                 |                                                                                                                                                                                                                                                                                                                                                                                                                                                                                                                                                                                                                                                                                                                                                                                                                                                                                                                                                                                                                                                                                                                                                                                                                                                                                                                             |

SCHOLARONE™  
Manuscripts

1 Is length of time in a stroke unit associated with better  
2 outcomes for patients with stroke in Australia? An  
3 observational study

4  
5  
6 Doreen Busingye<sup>1</sup>, Monique F. Kilkenny<sup>1,2</sup>, Tara Purvis<sup>1</sup>, Joosup Kim<sup>1,2</sup>, Sandy Middleton<sup>3</sup>,  
7 Bruce C.V. Campbell<sup>4</sup>, Dominique A. Cadilhac<sup>1,2</sup>

8  
9  
10  
11 <sup>1</sup>Translational Public Health and Evaluation Division, Stroke and Ageing Research, School of  
12 Clinical Sciences at Monash Health, Monash University, Clayton, Victoria, Australia

13 <sup>2</sup>Stroke Division, The Florey Institute of Neuroscience and Mental Health, University of  
14 Melbourne, Heidelberg, Victoria, Australia

15 <sup>3</sup>Nursing Research Institute, St Vincent's Health Australia (Sydney) and Australian Catholic  
16 University New South Wales, Australia

17 <sup>4</sup>Department of Medicine and Neurology, Royal Melbourne Hospital, University of  
18 Melbourne, Parkville, Victoria, Australia

19  
20  
21  
22 **\*Corresponding Author**

23 Email: [doreen.busingye@monash.edu](mailto:doreen.busingye@monash.edu), [busingyedoreen@gmail.com](mailto:busingyedoreen@gmail.com) (DB)

## 27 Abstract

28 **Objective:** Spending at least 90% of hospital admission in a stroke unit (SU) is a  
29 recommended indicator of receiving high quality stroke care. However, whether this makes a  
30 difference to patient outcomes is unknown. We aimed to investigate outcomes and factors  
31 associated with patients with acute stroke spending at least 90% of their admission in a SU,  
32 compared to those having less time in the SU.

33 **Design:** Observational study using cross-sectional data

34 **Setting:** Data from hospitals which participated in the 2015 Stroke Foundation National  
35 Audit: Acute Services (Australia) and had a SU. This audit includes an organisational survey  
36 and retrospective medical record audit of approximately 40 admissions from each hospital.

37 **Participants:** Patients admitted to a SU during their acute admission were included.

38 **Outcome measures:** Hospital-based patient outcomes included length of stay, independence  
39 on discharge, severe complications and discharge destination. Patient, organisational, and  
40 process indicators were included in multilevel logistic modelling to determine factors  
41 associated with spending at least 90% of their admission in a SU.

42 **Results:** Eighty-eight hospitals with a SU audited 2655 cases (median age 76 years, 55%  
43 male). Patients who spent at least 90% of their admission in a SU experienced: a length of  
44 stay that was two days shorter (coefficient -2.77 95% CI -3.45, -2.10), fewer severe  
45 complications (aOR: 0.60; 95% CI: 0.43, 0.84) and were less often discharged to residential  
46 aged care (aOR: 0.59; 95% CI: 0.38, 0.94) than those who had less time in the SU. Patients  
47 admitted to a SU within three hours of hospital arrival were three times more likely to spend  
48 at least 90% of their admission in a SU.

1  
2  
3 49 **Conclusion:** Spending at least 90% of time in a SU is a valid measure of stroke care quality  
4  
5 50 as it results in improved patient outcomes. Direct admission to stroke units is warranted.  
6  
7  
8 51

9  
10  
11 52 **ARTICLE SUMMARY**  
12  
13

14 53 **Strengths and limitations of this study:**  
15

- 16  
17 54 • A strength of this research is that it has provided further evidence of the importance of  
18  
19 55 length of time in a SU, not just access, which has implications for clinical practice and  
20  
21 56 development of new models of stroke care.  
22  
23  
24 57 • The study involved a large comprehensive dataset, which provided national representation  
25  
26 58 and utilised standardised data collection and an inclusive data dictionary to minimise  
27  
28 59 reporting bias and ensure data were reliably collected.  
29  
30  
31 60 • For some outcomes, only dates, rather than times were collected, which would have  
32  
33 61 provided more accuracy.  
34  
35  
36 62 • Design permits only association rather than determination of causality.  
37  
38  
39 63  
40  
41 64  
42  
43  
44 65  
45  
46  
47 66  
48  
49  
50 67  
51  
52  
53 68  
54  
55  
56 69  
57

## 70 **Introduction**

71           Stroke remains a major global health challenge because it is a leading cause of death  
72 and major disability.<sup>1</sup> It is well-established that patients treated in stroke units (SUs) are more  
73 likely to receive evidence-based clinical practices, have better survival and self-rated quality  
74 of life compared to those receiving care in other wards.<sup>2-4</sup> Direct admission to the SU is  
75 recommended, preferably within three hours of stroke onset.<sup>5</sup> Unless stroke is not a main  
76 clinical problem, guidelines also recommend that patients should be treated in a SU  
77 throughout their entire admission.<sup>6</sup> Various factors can affect the time that patients spend in a  
78 SU. These factors include the bed capacity of the SU,<sup>7</sup> bed management decisions,<sup>8,9</sup> hospital  
79 policies, delays in the emergency department,<sup>10</sup> the clinical acuity of the patient whereby  
80 intubation or management in intensive care is warranted,<sup>11</sup> or delayed discharges for the next  
81 stage of care (e.g. inpatient rehabilitation, or aged care facility). Within Australia and in other  
82 counties, it has been recommended that ‘spending at least 90% of the hospital admission in a  
83 SU’ is an important indicator of high quality acute stroke care.<sup>12-14</sup> However, there is limited  
84 evidence that the proportion of time spent in the SU is associated with better outcomes in  
85 patients with stroke. In an observational study using data from the United Kingdom National  
86 Sentinel Audit of Stroke, lower case fatality was associated with spending more than 50% of  
87 hospital stay in the SU.<sup>15</sup> Specific evidence is lacking relating to the benefits of spending 90%  
88 or more of the admission in a SU. In our study, we aimed to investigate in-hospital patient  
89 outcomes, and determine factors associated with patients with acute stroke spending at least  
90 90% of their admission in a SU, compared to those having less time in the SU.

## 91 **Materials and methods**

92           The description and reporting of this study is based on the Strengthening the  
93 Reporting of Observational Studies in Epidemiology (STROBE) statement.<sup>16</sup>

## 94 **Context of acute stroke care**

95 In Australia, the majority of patients with stroke are managed in public hospitals. It is  
96 usual practice that patients with suspected stroke or transient ischaemic attack present to the  
97 emergency department of hospitals, and are rapidly assessed, with brain imaging performed  
98 as a priority. Generally, all patients should be admitted to an acute SU, or medical ward if the  
99 hospital has no available beds in the SU or does not have a SU or neurology ward. If patients  
100 require intubation or require higher acuity monitoring and one-to-one nursing care, they may  
101 also be managed in an intensive care unit. The median length of stay in the acute setting is 5  
102 days (Q1, 2; Q3, 8),<sup>17</sup> after which, if rehabilitation is required, it is either provided in a  
103 separate subacute rehabilitation ward or hospital, or in a community setting.

## 104 **Study design and data source**

105 This observational study used data from hospitals participating in the Australian  
106 Stroke Foundation Acute Services Audit Program conducted in 2015. The audit program is  
107 run biennially to provide cross-sectional data on clinical performance, and has two  
108 components: an organisational survey and clinical audit.<sup>18</sup> Detailed methods for the Audit  
109 Program have been described elsewhere.<sup>18</sup> In brief, data obtained in the organisational survey  
110 are used to describe aspects of acute stroke services, including bed numbers, admissions per  
111 year and available resources e.g. stroke units. Data collected in the clinical audit are used to  
112 identify adherence to clinical guidelines and provide evidence on areas to improve the quality  
113 of care. Participation in the audit was voluntary and all Australian acute stroke services  
114 admitting at least three acute stroke patients per year were eligible to participate. Data for the  
115 first 40 or more consecutive acute stroke admissions (from 1 September 2014 and discharged  
116 by 28 February 2015) were collected by trained data abstractors from June to August 2015.  
117 To obtain a more representative sample, larger hospitals were encouraged to provide more

1  
2  
3 118 cases. Patients with a primary diagnosis of acute stroke (ICD-10 codes: I61, I62.9, I63, I64)  
4  
5 119 were eligible to be included in the audit.  
6

## 7 120 **Patient population and definitions**

8  
9  
10 121 Data for patients who were treated at a hospital with a SU and only those patients  
11  
12 122 admitted to a SU during their acute admission were included. Time spent in a SU (SU time)  
13  
14 123 was determined by subtracting the date of discharge from the SU, from the date of admission  
15  
16 124 to the SU. To determine patients who spent at least 90% of their admission in a SU, the SU  
17  
18 125 time was divided by total length of stay (LOS) in the hospital (total LOS; calculated by  
19  
20 126 subtracting date of discharge from hospital or death from date of admission to hospital. This  
21  
22 127 corresponds to the admission to the respective acute care ward, or commencement of an  
23  
24 128 episode of care) and the result multiplied by one hundred ( $[\text{SU time}/\text{total LOS}] * 100$ ). We  
25  
26 129 further determined early/late admission to the SU as  $\leq 3$  hours versus  $> 3$  hours from arrival to  
27  
28 130 the emergency department (ED) to admission on the SU. For patients whose stroke occurred  
29  
30 131 while they were already in hospital, date of stroke onset was used as a surrogate for date of  
31  
32 132 admission to hospital and arrival to ED.  
33  
34  
35

36 133 The following patient outcomes were assessed: LOS, death, level of independence on  
37  
38 134 discharge, severe complications and discharge destination. LOS was defined as the total  
39  
40 135 length of time from admission to the hospital to discharge from the hospital or death. Level of  
41  
42 136 independence on discharge was defined as a modified Rankin scale (mRS) score of zero to  
43  
44 137 two. A severe complication was a new event in hospital considered to be incapacitating, life  
45  
46 138 threatening and one that prolonged hospital admission such as pneumonia, falls, fever,  
47  
48 139 urinary tract infection, seizures and deep vein thrombosis. Discharge destinations included  
49  
50 140 private residence, inpatient rehabilitation or residential aged care facility.  
51  
52

53 141 Only valid yes/no responses were included in the analyses for data related to medical  
54  
55 142 history and the presence of symptoms on presentation to hospital. For data relating to  
56  
57

1  
2  
3 143 processes of care, e.g. received care in a SU, not documented and unknown responses were  
4  
5 144 assumed to be negative and included in the denominator. To minimise bias, only patients with  
6  
7 145 valid admission and discharge (SU and hospital) time or date were included.  
8

## 9 146 **Statistical analysis**

10  
11  
12 147 Univariable analyses were performed to determine differences between patients who  
13  
14 148 spent at least 90% and those who spent less than 90% of their admission in a SU. The chi-  
15  
16 149 square test was used for categorical variables. The nonparametric Wilcoxon Mann-Whitney  
17  
18 150 rank sum test was used for continuous variables that were not normally distributed.  
19

20  
21 151 Multilevel random effects logistic regression analyses, with level defined as hospital  
22  
23 152 were undertaken to determine:

- 24  
25 153 i) the association between spending at least 90% of admission in a SU and in-  
26  
27 154 hospital outcomes such as death, level of independence on discharge (mRS 0-2),  
28  
29 155 severe complications and various discharge destinations.  
30  
31  
32 156 ii) factors associated with spending at least 90% of the admission in a SU.  
33  
34

35 157 For the continuous outcome of LOS, a median regression model with bootstrap  
36  
37 158 estimated standard errors was undertaken. A parsimonious approach to multivariable model  
38  
39 159 development was used and independent variables with statistical significance ( $p \leq 0.05$ ) from  
40  
41 160 univariable analyses were included.  
42

43  
44 161 To determine factors associated with spending at least 90% of the admission in a SU,  
45  
46 162 independent variables considered for inclusion in multivariable analyses were patient factors  
47  
48 163 e.g. age; health system factors e.g. private hospital, presence of a stroke care coordinator and  
49  
50 164 onsite neurosurgery; and clinical process factors e.g. admission to SU within three hours of  
51  
52 165 arrival to ED. Other potential confounders including stroke type (ischaemic vs intracerebral  
53  
54 166 haemorrhage and unknown) and stroke severity factors such as inability to walk, arm  
55  
56  
57  
58  
59  
60



1  
2  
3 167 weakness, and speech impairment on admission and incontinence within 72 hours, which are  
4  
5 168 based on the Counsell et al validated prognostic model for comparing patient outcomes,<sup>19</sup>  
6  
7 169 were included. This validated model<sup>19</sup> has been compared against a model using age plus  
8  
9 170 scores on the National Institutes of Health Stroke Scale and both prognostic models  
10  
11 171 performed well overall, thus the choice between them should be based on clinical and  
12  
13 172 practical considerations.<sup>20</sup>

15  
16 173 Models for association between length of time spent in a SU and in-hospital outcomes  
17  
18 174 were adjusted for patient characteristics (e.g. premorbid function and past history of atrial  
19  
20 175 fibrillation), variables with clinical importance (e.g. sex and age), stroke type and stroke  
21  
22 176 severity factors. Additional sensitivity analyses were undertaken, including:

- 24 177 i) propensity score matching with stratification to minimise potential  
25  
26 178 confounding by indication and compare between similar subgroups of patients  
27  
28 179 (see Supplemental Methods).  
29  
30  
31 180 ii) other cut offs for percentage of admission spent in a SU (e.g.  $\geq 50$  to  $<60$ ,  $\geq$   
32  
33 181  $60$  to  $<70$ ,  $\geq 70$  to  $<80$ ,  $\geq 80$  to  $<90$ ) were undertaken to determine a potential  
34  
35 182 dose effect with LOS, severe complications, and independence on discharge.  
36  
37

38 183 Standard techniques were implemented to check for collinearity. Values of  $p < 0.05$   
39  
40 184 were considered significant for all analyses. Adjusted odds ratio or coefficients with 95%  
41  
42 185 confidence intervals (CIs) were calculated. Stata 12.0 (Stata Corporation, 2012, TX)  
43  
44 186 statistical software was used for all analyses.  
45

46 187 Ethics approval was granted through Monash University Human Research Ethics  
47  
48 188 Committee (CF16/825-2016000402).  
49  
50

## 51 189 **Patient and Public Involvement**

52  
53  
54 190 Patients and/or the public were not involved in the development of this research  
55  
56 191 project.  
57

## 192 **Results**

193 Overall, the clinical audit comprised data from 4087 patients at 112 hospitals. Most  
194 were public hospitals (n=104, 93%) and were located in metropolitan areas (n=105, 94%).  
195 Twenty-four of these hospitals (n=664 patients) did not have a SU. Of the patients admitted  
196 to a hospital with a SU, 20% (n=684) were not treated in a SU at any time during their  
197 admission. There were 2739 patients treated in a SU at some time during their admission.  
198 Eighty-four patients with invalid or missing dates of admission or discharge from the hospital  
199 or SU were excluded from the analyses. Overall, 2655 patients were assessed, whereby  
200 almost two-thirds (64%) spent at least 90% of their admission in a SU. Compared to patients  
201 not treated on the SU, patients admitted in a SU were more likely to be younger, male,  
202 independent prior to stroke and have an ischaemic stroke (Supplemental Table A).

### 203 **Patient characteristics and clinical processes**

204 The median age for all included patients (n=2655) was 76 years (Q1:65, Q3:84) and  
205 55% were male (Table 1). Patients who spent at least 90% of their admission in a SU were  
206 more likely to be younger, and have less severe strokes i.e. fewer were unable to walk on  
207 admission or incontinent within 72 hours of admission compared to those who spent less than  
208 90% of their admission in a SU (Table 1 and Supplemental Table B).

209 Importantly, patients who spent at least 90% of their admission in a SU compared to  
210 those who did not, were more likely to be admitted to a SU within three hours of arrival to  
211 ED, have a brain scan within 24 hours, be discharged from the hospital on the same day they  
212 were discharged from the SU (Table 1), be assessed for rehabilitation by a physiotherapist  
213 within 48 hours of admission and have rehabilitation therapy commenced within 48 hours of  
214 their initial assessment (Supplemental Table C).

215 Patients who spent at least 90% of their admission in a SU had a shorter median time  
 216 (hours) from arrival to the ED to admission on a SU compared to those who spent less than  
 217 90% of their admission in a SU (median time 6 hours, Q1: 4, Q3: 10 versus median time 17  
 218 hours, Q1: 6, Q3: 35;  $p < 0.001$ ).

219

220 **Table 1. Characteristics of patients with stroke who spent at least 90% and those who**  
 221 **spent less than 90% of admission in a stroke unit**

| Spent at least 90% of admission in a SU                     | Yes<br>(N= 1687)<br>n (%) | No<br>(N=968)<br>n (%) | p-value |
|-------------------------------------------------------------|---------------------------|------------------------|---------|
| Patient characteristics                                     |                           |                        |         |
| Age, median (Q1, Q3) <sup>a</sup>                           | 75 (65, 84)               | 77 (66, 85)            | 0.006   |
| Male                                                        | 936 (55)                  | 537 (55)               | 0.99    |
| Independent prior to stroke (mRS 0–2)                       | 1401 (83)                 | 810 (84)               | 0.68    |
| In hospital stroke                                          | 26 (2)                    | 37 (4)                 | <0.001  |
| Stroke type                                                 |                           |                        |         |
| Ischaemic stroke                                            | 1426 (85)                 | 805 (83)               | 0.36    |
| Haemorrhagic stroke                                         | 162 (10)                  | 114 (12)               | 0.08    |
| Unknown stroke type                                         | 99 (6)                    | 49 (5)                 | 0.38    |
| Stroke severity <sup>b</sup>                                |                           |                        |         |
| Arm weakness on admission                                   | 1030 (62)                 | 592 (63)               | 0.82    |
| Impaired speech on admission                                | 987 (60)                  | 554 (59)               | 0.52    |
| Unable to walk on admission                                 | 862 (52)                  | 543 (57)               | 0.005   |
| Incontinence at 72 hours of admission                       | 488 (30)                  | 340 (36)               | 0.001   |
| History of comorbidities                                    |                           |                        |         |
| Atrial fibrillation <sup>c</sup>                            | 418 (28)                  | 276 (33)               | 0.01    |
| Ischaemic heart disease <sup>c</sup>                        | 396 (27)                  | 254 (30)               | 0.05    |
| Previous stroke or TIA <sup>d</sup>                         | 513 (34)                  | 277 (32)               | 0.49    |
| Clinical processes of care                                  |                           |                        |         |
| Transferred to SU within 3 hours of ED arrival <sup>c</sup> | 229 (16)                  | 52 (6)                 | <0.001  |

| <b>Spent at least 90% of admission in a SU</b>                    | <b>Yes<br/>(N= 1687)<br/>n (%)</b> | <b>No<br/>(N=968)<br/>n (%)</b> | <b>p-value</b> |
|-------------------------------------------------------------------|------------------------------------|---------------------------------|----------------|
| Transferred to SU within 24 hours of ED arrival <sup>c</sup>      | 1406 (95)                          | 516 (62)                        | <0.001         |
| Brain scan within 24 hours of ED arrival <sup>c</sup>             | 1329 (97)                          | 722 (95)                        | 0.01           |
| Date of discharge from SU same as date of discharge from hospital | 1567 (99)                          | 456 (52)                        | <0.001         |
| <b>Organisational characteristics</b>                             |                                    |                                 |                |
| Metropolitan hospital                                             | 1634 (97)                          | 955 (99)                        | 0.004          |
| Private hospital                                                  | 116 (7)                            | 94 (10)                         | 0.01           |
| Stroke care coordinator present                                   | 1030 (61)                          | 550 (57)                        | 0.03           |
| Access to onsite neurosurgery                                     | 566 (34)                           | 402 (42)                        | <0.001         |
| Stroke team involved in quality improvement in last 2 years       | 1507 (89)                          | 831 (86)                        | 0.008          |
| Access to early supported discharge                               |                                    |                                 |                |
| Team                                                              | 229 (14)                           | 102 (11)                        | 0.02           |
| Regular multi-disciplinary team meetings                          | 1659 (98)                          | 941 (97)                        | 0.05           |
| <b>Number of beds on SU</b>                                       |                                    |                                 |                |
| <5                                                                | 752 (45)                           | 464 (48)                        | 0.001          |
| 5-9                                                               | 462 (27)                           | 307 (32)                        |                |
| ≥10                                                               | 473 (28)                           | 197 (20)                        |                |
| Stroke admissions last year ≥100                                  | 1563 (93)                          | 916 (95)                        | 0.05           |
| Stroke specialist research nurse involved with treatment          | 319 (19)                           | 140 (14)                        | 0.004          |
| Access to ongoing inpatient rehabilitation                        | 1554 (92)                          | 916 (95)                        | 0.01           |
| <b>In-hospital outcomes</b>                                       |                                    |                                 |                |
| Any severe complication <sup>f</sup>                              | 133 (8)                            | 129 (14)                        | <0.001         |
| Independent on discharge (mRS 0-2)                                | 845 (54)                           | 408 (47)                        | 0.002          |
| Died in hospital                                                  | 107 (6)                            | 95 (10)                         | 0.001          |
| <b>Discharge destination (survivors)</b>                          |                                    |                                 |                |
| Private residence                                                 | 869 (55)                           | 453 (52)                        | 0.14           |
| Residential aged care facility                                    | 74 (5)                             | 77 (9)                          | <0.001         |

| Spent at least 90% of admission in a SU | Yes       | No       | p-value |
|-----------------------------------------|-----------|----------|---------|
|                                         | (N= 1687) | (N=968)  |         |
|                                         | n (%)     | n (%)    |         |
| Inpatient rehabilitation                | 487 (31)  | 268 (31) | 0.95    |
| Other hospital ward                     | 122 (8)   | 54 (6)   | 0.16    |
| Other                                   | 28 (2)    | 21 (2)   | 0.28    |

222 Q1: 1st quartile; Q3: 3rd quartile; ED: emergency department; SU: stroke unit; mRS: modified Rankin scale.  
 223 TIA: transient ischaemic attack; <sup>a</sup> <1% unknown/not documented data; <sup>b</sup> 1-5% unknown/not documented data;  
 224 <sup>c</sup> 11-15% unknown/not documented data; <sup>d</sup> 6-10% unknown/not documented data; <sup>e</sup> 16-20% unknown/not  
 225 documented data; <sup>f</sup> a complication considered incapacitating, life threatening and one that prolongs hospital  
 226 admission e.g. pneumonia, falls, fever, urinary tract infection, seizures, deep vein thrombosis etc.

## 227 In-hospital outcomes and complications

228 Complications such as aspiration pneumonia, fever, urinary tract infections, falls,  
 229 stroke progression and seizures were less common in patients who spent at least 90% of their  
 230 admission in a SU compared to those who spent less time in a SU (Fig 1).

232 The median LOS (days) in the hospital for patients who spent at least 90% of their  
 233 admission in a SU was significantly shorter than those who spent less than 90% of their  
 234 admission in a SU (median LOS 4, Q1: 3, Q3: 8 versus median LOS 7, Q1: 4, Q3: 13;  
 235  $p < 0.001$ ). Patients who spent at least 90% of their admission in a SU were more likely to be  
 236 independent on discharge and less likely to have any severe complication or die in the  
 237 hospital (Table 1).

238 On adjustment for confounding variables, no differences were detected in  
 239 independence at discharge or death between the two groups (Table 2). However, patients who  
 240 spent at least 90% of their admission in a SU were 0.60 times less likely to have any severe  
 241 complication and 0.59 times less likely to be discharged to a residential aged care facility  
 242 than those who spent less than 90% of admission in a SU (Table 2). Patients discharged to

243 aged care were more likely to be transferred from the SU to another ward/unit before being  
 244 discharged from hospital regardless of how long they spent in the SU (Discharged aged care:  
 245 60% were discharged from the SU the same day as from hospital; other destination: 84%).

246 Median LOS for patients who spent at least 90% of their admission in a SU was two  
 247 days shorter than for those who did not. No difference in median LOS between groups for  
 248 those patients who suffered a severe complication was evident (Table 2). Results from the  
 249 sensitivity analyses using propensity score matching provided evidence of benefit from a  
 250 greater proportion of time spent in a SU when confounding by indication is controlled  
 251 (Supplemental Tables D and E). These results are consistent with our findings from the  
 252 primary analysis.

253  
 254  
 255 **Table 2. Adjusted odds ratios/coefficients for in-hospital outcomes for patients who**  
 256 **spent at least 90% of their admission in a stroke unit**

| Model | Outcome                                      | aOR <sup>a</sup>               | 95% CI        | p value        |
|-------|----------------------------------------------|--------------------------------|---------------|----------------|
| 1.    | Any severe complication <sup>b</sup>         | 0.60                           | 0.43, 0.84    | 0.003          |
| 2.    | Independent on discharge (mRS 0-2)           | 1.19                           | 0.92, 1.53    | 0.19           |
| 3.    | Died                                         | 0.72                           | 0.49, 1.06    | 0.09           |
| 4.    | Discharged to private residence              | 1.05                           | 0.84, 1.32    | 0.67           |
| 5.    | Discharged to inpatient rehabilitation       | 0.97                           | 0.76, 1.23    | 0.79           |
| 6.    | Discharged to residential aged care facility | 0.59                           | 0.38, 0.94    | 0.03           |
|       |                                              | <b>Coefficient<sup>a</sup></b> | <b>95% CI</b> | <b>p value</b> |
| 7.    | Length of stay (discharged)                  | -2.77                          | -3.45, -2.10  | <0.001         |
| 8.    | Length of stay (if severe complication)      | -1.89                          | -8.42, 4.63   | 0.57           |

|     |                                         |       |              |        |
|-----|-----------------------------------------|-------|--------------|--------|
| 9.  | Length of stay (no severe complication) | -2.58 | -3.12, -2.04 | <0.001 |
| 10. | Length of stay (died)                   | -1.33 | -5.14, 2.48  | 0.49   |
| 11. | Length of stay (discharged + died)      | -2.88 | -3.42, -2.35 | <0.001 |

257 aOR: adjusted odds ratio; CI: confidence interval. <sup>a</sup>Models adjusted for age, sex, premorbid function,  
 258 stroke type, stroke severity and past history of atrial fibrillation. <sup>b</sup>a complication considered incapacitating,  
 259 life threatening and one that prolongs hospital admission e.g. pneumonia, falls, fever, urinary tract  
 260 infection, seizures, deep vein thrombosis etc.

261 Sensitivity analyses, including other cut offs for percentage of admission spent in a  
 262 SU (e.g.  $\geq 50$  to  $< 60$ ,  $\geq 60$  to  $< 70$ ,  $\geq 70$  to  $< 80$ ,  $\geq 80$  to  $< 90$ ), provided evidence of a potential  
 263 dose effect between occurrence of any severe complications and percentage of admission  
 264 spent in a SU. In this analysis, in comparison to other cut offs of percentage of admission  
 265 spent in a SU, spending at least 90% of admission in a SU was associated with fewer severe  
 266 complications than spending less than 50% of admission in a SU ( $p < 0.001$ ; Supplemental  
 267 Table F).

## 268 **Organisational characteristics**

269 Hospitals with onsite neurosurgery services, located in metropolitan areas or those  
 270 that were private less often kept their patients in the SU for at least 90% of their admission  
 271 (Table 1, Supplemental Table B). Features of hospitals that were able to provide access to the  
 272 SU for at least 90% of the patient's admission included those with: at least 10 beds in a SU, a  
 273 SU coordinator, access to early supported discharge team, a stroke specialist research nurse  
 274 involved in treatment and those in which the stroke team was involved in quality  
 275 improvement in the previous two years (Table 1).

## 276 **Factors associated with spending at least 90% of admission in a** 277 **SU**

278 In multivariable analysis, similar factors remained relevant for likelihood of spending  
 279 at least 90% of admission in a SU (Table 3). For instance, patients who were admitted to a  
 280 SU within three hours of arrival to the ED were three times more likely to spend at least 90%  
 281 of their admission in a SU compared to those who were admitted after three hours of arrival  
 282 to the ED (Table 3). This finding was also similar for patients admitted in a SU within 24  
 283 hours of arrival to the ED (aOR: 26.17, 95% CI: 17.08, 40.09). Patients who were admitted to  
 284 a hospital with at least 10 beds on the SU were more likely to spend at least 90% of  
 285 admission in a SU compared to those admitted to a hospital with less than five beds on the  
 286 SU.

287 **Table 3. Factors associated with patients with stroke spending at least 90% of their**  
 288 **admission in a stroke unit**

| Factors                                                     | OR <sup>a</sup> | 95% CI     | p value |
|-------------------------------------------------------------|-----------------|------------|---------|
| Age                                                         |                 |            |         |
| <65                                                         | 1.00            |            |         |
| 65-74                                                       | 1.11            | 0.78, 1.59 | 0.56    |
| 75-84                                                       | 0.94            | 0.67, 1.33 | 0.73    |
| ≥85                                                         | 0.92            | 0.63, 1.35 | 0.68    |
| Unable to walk on admission                                 | 0.75            | 0.57, 0.99 | 0.04    |
| Incontinent at 72 hours of admission                        | 0.84            | 0.63, 1.12 | 0.24    |
| History of atrial fibrillation                              | 1.00            | 0.76, 1.33 | 0.98    |
| History of ischaemic heart disease                          | 0.87            | 0.66, 1.13 | 0.30    |
| Any severe complication <sup>b</sup>                        | 0.64            | 0.43, 0.96 | 0.03    |
| Stroke occurred while patient was in hospital               | 0.21            | 0.08, 0.56 | 0.002   |
| Transferred to SU within 3 hours of ED arrival              | 3.41            | 2.14, 5.42 | <0.001  |
| Brain scan assessment within 24 hours of ED arrival         | 2.03            | 1.08, 3.81 | 0.03    |
| Treated in a metropolitan hospital                          | 0.70            | 0.13, 3.78 | 0.68    |
| Treated in a private hospital                               | 0.77            | 0.33, 1.80 | 0.55    |
| Stroke care coordinator present                             | 1.42            | 0.91, 2.22 | 0.12    |
| Treated in a hospital with onsite neurosurgery              | 0.49            | 0.30, 0.80 | 0.005   |
| Stroke team involved in quality improvement in last 2 years | 1.19            | 0.62, 2.31 | 0.60    |



|                                                          |      |            |      |
|----------------------------------------------------------|------|------------|------|
| Access to early supported discharge team                 | 1.66 | 0.83, 3.29 | 0.15 |
| Regular multi-disciplinary team meetings                 | 1.51 | 0.36, 6.42 | 0.57 |
| Number of beds on SU                                     |      |            |      |
| <5                                                       | 1.00 |            |      |
| 5-9                                                      | 1.25 | 0.75, 2.09 | 0.39 |
| ≥10                                                      | 1.91 | 1.08, 3.35 | 0.03 |
| Stroke admissions last year ≥100                         | 0.55 | 0.22, 1.33 | 0.18 |
| Stroke specialist research nurse involved with treatment | 1.52 | 0.80, 2.91 | 0.20 |
| Access to ongoing inpatient rehabilitation               | 1.02 | 0.38, 2.69 | 0.97 |

289 OR: odds ratio; CI: confidence interval; ED: emergency department; SU: stroke unit. <sup>a</sup> Multivariable model  
 290 adjusted for all factors listed in table; level was hospital. <sup>b</sup> a complication considered incapacitating, life  
 291 threatening and one that prolongs hospital admission e.g. pneumonia, falls, fever, urinary tract infection,  
 292 seizures, deep vein thrombosis etc.

## 293 Discussion

294 To our knowledge, this is the first study to describe whether the recommendation for  
 295 patients with stroke to spend at least 90% of their admission in a SU is a relevant indicator of  
 296 high quality stroke care. We demonstrated an association between patients who spent at least  
 297 90% of their admission in a SU and a reduced LOS, fewer severe complications and less  
 298 discharges to a residential aged care facility. Similar results were evident from the primary  
 299 analyses using the whole sample and propensity score matching, leading to more confidence  
 300 in the validity of results. While results are based on stroke care provided in Australian  
 301 hospitals, these findings are important for promoting and ensuring that patients with stroke  
 302 spend most of their acute hospital stay in a SU and can be generalised to other countries with  
 303 similar models of stroke care.

304 Although researchers have established that management of patients in a SU is  
 305 associated with a reduction in length of hospital stay compared to other wards,<sup>21, 22</sup> our  
 306 findings have further demonstrated that length of time spent in a SU may also be important.

1  
2  
3 307 Given the demands for beds in SUs,<sup>22</sup> the two day reduction in LOS observed in our study is  
4  
5 308 clinically important. Additionally, from an economic perspective, this reduction in LOS  
6  
7 309 translates to potentially large cost-savings.<sup>23</sup> We acknowledge that given the study design we  
8  
9 310 cannot make inferences about causality. Clinically, a longer LOS may be a consequence of  
10  
11 311 experiencing a severe complication (as by definition may increase time in hospital), a more  
12  
13 312 severe form of stroke, or delays in access to the next stage of care. Although more patients  
14  
15 313 with a severe complication were not treated in a SU, for those who did access SU care and  
16  
17 314 experienced a severe complication, there was no difference in LOS based on the proportion  
18  
19 315 of time spent in the SU. The reduced likelihood of discharge to residential aged care facility  
20  
21 316 for those spending >90% of time in the SU is potentially resultant from transfers to other  
22  
23 317 wards when waiting for longer-term care. Regardless, with the additional trend towards  
24  
25 318 reduced mortality for patients who spent at least 90% of admission in a SU, these results lend  
26  
27 319 further support for ensuring that all patients with stroke spend most of their acute admission  
28  
29 320 in a SU.  
30  
31

32  
33 321 Given that spending at least 90% of admission in a SU potentially influences  
34  
35 322 outcomes, we have further demonstrated factors that are responsible for achieving this  
36  
37 323 indicator. The main finding is that being admitted to a SU within three hours of arrival to the  
38  
39 324 ED was independently associated with spending at least 90% of admission in a SU. This  
40  
41 325 finding is of great importance because early admission to a SU has also been associated with  
42  
43 326 better recovery.<sup>24</sup> Given evidence that SU care significantly reduces death and disability after  
44  
45 327 stroke,<sup>3,4</sup> and that the clinical guidelines for management of stroke recommend direct or early  
46  
47 328 admission to a SU,<sup>5</sup> our finding provides further evidence that early admission on a SU  
48  
49 329 should be a high priority for clinicians and health administrators. While direct access to  
50  
51 330 computed tomography from ambulance arrival has been achieved in some hospitals with the  
52  
53 331 introduction of 'Code Stroke',<sup>25</sup> consideration of the added benefits for patients of direct  
54  
55  
56  
57  
58  
59  
60

1  
2  
3 332 admissions to stroke units is warranted. Unfortunately, overall access to SU in different  
4  
5 333 countries remains highly variable. For example, in Australia only 67% of the patients with  
6  
7 334 stroke received SU care in 2015.<sup>12</sup> This is a major difference to countries like the United  
8  
9 335 Kingdom where 96% of patients received SU care.<sup>13</sup> There is need to improve access as well  
10  
11 336 as timely admission to a SU.

12  
13 337 Additionally, having a brain scan within 24 hours of arrival to the ED was associated  
14  
15 338 with spending at least 90% of admission in a SU. An early brain scan is important for  
16  
17 339 confirming the type of stroke and to exclude stroke mimics, thus enabling commencement of  
18  
19 340 time-dependent therapies.<sup>5</sup> The fact that patients who spent at least 90% of their admission in  
20  
21 341 a SU were more likely to begin rehabilitation therapy within 48 hours of initial assessment  
22  
23 342 highlights the importance of this indicator. These findings provide impetus for early  
24  
25 343 assessment and early admission of all stroke patients onto a SU as this may help to advocate  
26  
27 344 for patients to spend most of their acute hospital stay in a SU.

28  
29 345 Having at least 10 beds on the SU was associated with spending at least 90% of  
30  
31 346 admission in a SU and this finding provides a strong argument for capacity building and  
32  
33 347 potential redistribution of resources within hospitals to better support care for patients with  
34  
35 348 stroke where there is the relevant throughput of patients.<sup>12</sup>

36  
37 349 There are some limitations that must be acknowledged. The time for discharge from  
38  
39 350 the SU and hospital was unavailable. Therefore, our analysis was limited to dates which do  
40  
41 351 not provide fine granularity that time would have provided. Also some observations were  
42  
43 352 excluded because of invalid or missing dates. The comprehensive dataset did allow us to  
44  
45 353 adjust our multivariable models for a number of comorbidities and patient variables,  
46  
47 354 including stroke severity, for which we used a validated prognostic model. However, we  
48  
49 355 acknowledge that the influence of unmeasured confounders such as socioeconomic status,  
50  
51 356 and other comorbidities could not be fully addressed. Data on patients' ward of first  
52  
53  
54  
55  
56  
57  
58  
59  
60

1  
2  
3 357 admission, or transfers during the admission were not collected which precludes us from  
4  
5 358 making definitive conclusions such as whether individuals with severe stroke or who suffer  
6  
7 359 severe complications are admitted or transferred to the intensive care unit or other high  
8  
9 360 dependency units first before admission on a SU or during their acute stay. Although there is  
10  
11 361 evidence that SU care reduces mortality through prevention and treatment of infection and  
12  
13 362 immobility-related complications,<sup>26</sup> having these additional data would have provided  
14  
15 363 insight to why patients with severe stroke or severe complications were less likely to spend at  
16  
17 364 least 90% of their admission in a SU. Additional longer-term outcomes would also be  
18  
19 365 beneficial. Given these limitations and the nature of the study design which precludes us from  
20  
21 366 drawing firm conclusions about temporal relationships, these findings should be interpreted  
22  
23 367 with caution. The above limitations notwithstanding, a strength of our study is the large data  
24  
25 368 set from a wide cross-section of Australian hospitals which provides national representation.  
26  
27  
28

## 369 **Conclusions**

370 Spending at least 90% of time in a SU is a useful measure of care quality and was  
371 associated with better patient outcomes such as shorter LOS, fewer severe complications and  
372 less discharge to aged care facilities. Our findings have important implications for clinical  
373 practice and development of new models of stroke care.  
374

## 374 **Acknowledgements**

375 We acknowledge the Stroke Foundation for coordinating this National Stroke Audit  
376 and recognise the AuSDaT tool used to collect these data. We gratefully acknowledge the  
377 hospitals participating in the National Stroke Audit and all the clinicians who contributed to  
378 data collection over the audit cycles. Preliminary results from this study were presented at the  
379 27<sup>th</sup> Annual Scientific Meeting of the Stroke Society of Australasia, Queenstown, 2017 and  
380 have been published <http://journals.sagepub.com/doi/10.1177/1747493017720548>.

## 381 **Disclosures**

382 Doreen Busingye, Monique Kilkenny, Tara Purvis, Joosup Kim, and Dominique  
383 Cadilhac have nothing to disclose. Bruce Campbell and Sandy Middleton are members of the  
384 Stroke Foundation Clinical Council.

## 385 **Funding**

386 This research received no specific grant from any funding agency in the public,  
387 commercial or not-for-profit sectors. The following authors receive Research Fellowship  
388 support from the NHMRC: Dominique Cadilhac (1063761- co-funded Heart Foundation),  
389 Monique Kilkenny (Early Carer Fellowship 1109426),

## 390 **Authors and individual contributions**

391 DB, MK, DC were responsible for study concept and design. DB, TP, JK, MK were  
392 responsible for statistical analyses. DB drafted the manuscript. DB, MK, TP, JK, SM, BC,  
393 DC interpreted the data, critically revised the manuscript for important intellectual context  
394 and approved the final version for submission. DB, MK, TP, JK, SM, BC, DC agree to be  
395 accountable for all aspects of the work.

## 396 **Data Sharing Statement**

397 Contact can be made with the corresponding author for queries relating to  
398 unpublished data.

399

400

## 401 **References**

- 402 1. Feigin VL, Krishnamurthi RV, Parmar P, Norrving B, Mensah GA, Bennett DA, et al.  
403 Update on the Global Burden of Ischemic and Hemorrhagic Stroke in 1990-2013: The  
404 GBD 2013 Study. *Neuroepidemiology*. 2015;45:161-176
- 405 2. Cadilhac DA, Pearce DC, Levi CR, Donnan GA. Improvements in the quality of care  
406 and health outcomes with new stroke care units following implementation of a  
407 clinician-led, health system redesign programme in New South Wales, Australia.  
408 *Qual Saf Health Care*. 2008;17:329-333
- 409 3. Stroke Unit Trialists Collaboration. Organised inpatient (stroke unit) care for stroke.  
410 *Cochrane Database Syst Rev*. 2013:CD000197
- 411 4. Cadilhac D, Andrew N, Lannin N, Middleton S, Levi C, Dewey H, et al. Quality of  
412 acute care and long-term quality of life and survival: the Australian Stroke Clinical  
413 Registry. *Stroke*. 2017;48:1027-1032
- 414 5. National Stroke Foundation. *Clinical guidelines for stroke management 2010*.  
415 Melbourne; 2010.
- 416 6. Intercollegiate Stroke Working Party. The National Clinical Guidelines for Stroke.  
417 2016
- 418 7. Stroke Foundation. *National Stroke Audit Acute Services Report 2017*. Melbourne:  
419 Stroke Foundation; 2017.
- 420 8. Purvis T, Moss K, Francis L, Borschmann K, Kilkenny M, Denisenko S, et al.  
421 Benefits of clinical facilitators on improving stroke care in acute hospitals: a new  
422 programme for Australia. *Internal Medicine Journal*. 2017;47:775-797
- 423 9. National Health Service Improvement. *Implementing best practice in acute care: case*  
424 *studies from the Stroke Improvement Programme projects*. Leicester: National Health  
425 Service; 2010.

- 1  
2  
3 426 10. Middleton S, Levi C, Dale S, Cheung N, McInnes E, Considine J, et al. Triage,  
4  
5 427 treatment and transfer of patients with stroke in emergency department trial (the T<sup>3</sup>  
6  
7 428 Trial): a cluster randomised trial protocol. *Implement Sci.* 2016;11:DOI  
8  
9 429 10.1186/s13012-13016-10503-13016  
10  
11 430 11. Alonso A, Ebert A, Kern R, Rapp S, Hennerici M, Fatar M. Outcome Predictors of  
12  
13 431 Acute Stroke Patients in Need of Intensive Care Treatment. *Cerebrovasc Dis.*  
14  
15 432 2015;40:10-17  
16  
17 433 12. National Stroke Foundation. National Stroke Audit – Acute Services Report 2015.  
18  
19 434 2015  
20  
21 435 13. Royal College of Physicians. Sentinel Stroke National Audit Programme (SSNAP)  
22  
23 436 Clinical Audit January-March 2016 Public Report. 2016  
24  
25 437 14. Australian Commission on Safety and Quality in Health Care. *Acute Stroke Clinical*  
26  
27 438 *Care Standard.* Sydney: ACSQHC; 2015.  
28  
29 439 15. Rudd A, Hoffman A, Irwin P, Lowe D, Pearson M. Stroke unit care and outcome:  
30  
31 440 results from the 2001 National Sentinel Audit of Stroke (England, Wales and  
32  
33 441 Northern Ireland). *Stroke.* 2005;36:103-106  
34  
35 442 16. von Elm E, Altman DG, Egger M, Pocock SJ, Gøtzsche PC, Vandenbroucke JP, et al.  
36  
37 443 The Strengthening the Reporting of Observational Studies in Epidemiology  
38  
39 444 (STROBE) Statement: Guidelines for Reporting Observational Studies. *PLoS Med.*  
40  
41 445 2007;4:e296  
42  
43 446 17. Cadilhac D, Lannin N, Anderson C, Kim J, Andrew N, Kilkenny M, et al. *The*  
44  
45 447 *Australian Stroke Clinical Registry Annual Report 2016.* Melbourne: The Florey  
46  
47 448 Institute of Neuroscience and Mental Health 2017.  
48  
49 449 18. Harris D, Cadilhac D, Hankey GJ, Hillier S, Kilkenny M, Lalor E. National Stroke  
50  
51 450 Audit: The Australian Experience. *Clin Audit.* 2010;2:25-31  
52  
53  
54  
55  
56  
57  
58  
59  
60

- 1  
2  
3 451 19. Counsell C, Dennis M, McDowall M, Warlow C. Predicting outcome after acute and  
4  
5 452 subacute stroke: development and validation of new prognostic models. *Stroke*.  
6  
7 453 2002;33:1041-1047  
8  
9 454 20. Sim J, Teece L, Dennis MS, Roffe C, Team SOSS. Validation and Recalibration of  
10  
11 455 Two Multivariable Prognostic Models for Survival and Independence in Acute Stroke.  
12  
13 456 *PLoS One*. 2016;11:e0153527  
14  
15  
16 457 21. Zhu HF, Newcommon NN, Cooper ME, Green TL, Seal B, Klein G, et al. Impact of a  
17  
18 458 stroke unit on length of hospital stay and in-hospital case fatality. *Stroke*. 2009;40:18-  
19  
20 459 23  
21  
22 460 22. Cadilhac DA, Purvis T, Kilkenny MF, Longworth M, Mohr K, Pollack M, et al.  
23  
24 461 Evaluation of Rural Stroke Services Does Implementation of Coordinators and  
25  
26 462 Pathways Improve Care in Rural Hospitals? *Stroke*. 2013;44:2848-2853  
27  
28  
29 463 23. Phillips SJ, Eskes GA, Gubitz GJ, Queen Elizabeth IIHSCAST. Description and  
30  
31 464 evaluation of an acute stroke unit. *CMAJ*. 2002;167:655-660  
32  
33 465 24. Silvestrelli G, Parnetti L, Paciaroni M, Caso V, Corea F, Vitali R, et al. Early  
34  
35 466 admission to stroke unit influences clinical outcome. *Eur. J. Neurol*. 2006;13:250-255  
36  
37 467 25. Gomez CR, Malkoff MD, Sauer CM, Tulyapronchote R, Burch CM, Banet GA. Code  
38  
39 468 stroke. An attempt to shorten in-hospital therapeutic delays. *Stroke*. 1994;25:1920-  
40  
41 469 1923  
42  
43  
44 470 26. Govan L, Langhorne P, Weir CJ. Does the prevention of complications explain the  
45  
46 471 survival benefit of organized inpatient (stroke unit) care? - Further analysis of a  
47  
48 472 systematic review. *Stroke*. 2007;38:2536-2540  
49  
50  
51 473  
52  
53 474  
54  
55 475  
56  
57  
58  
59  
60



1  
2  
3 **476 Figure Legend**  
4  
5

6 **477 Figure 1. Differences in complications between patients who spent at least 90% and**  
7  
8 **478 those who spent less than 90% of their admission in a stroke unit.**

9  
10  
11 **479 \*significant  $p < 0.05$ ; <sup>a</sup>symptomatic haemorrhagic transformation.**  
12  
13

14  
15 480  
16

17  
18 481  
19

20  
21 **482 Supplemental information**  
22

23 483 Supplemental Table A: Characteristics of patients with stroke treated in a stroke unit versus  
24 484 those not treated in a stroke unit

25  
26  
27 485 Supplemental Table B. Characteristics of patients with stroke who spent at least 90% and  
28 486 those who spent less than 90% of admission in a stroke unit

29  
30  
31 487 Supplemental Table C. Adherence to processes of care for patients who spent at least 90%  
32 488 and those who spent less than 90% of hospital stay in a stroke unit

33  
34  
35 489 Supplemental Methods for Propensity score matching with stratification

36  
37 490 Supplemental Table D. Adjusted beta coefficient for differences between treatment groups  
38 491 (Model A)

39  
40  
41 492 Supplemental Table E: Adjusted beta coefficient for differences between treatment groups  
42 493 (Model B)

43  
44  
45 494 Supplemental Table F. Association between percentages of hospital stay spent in a stroke unit  
46 495 and in-hospital outcomes of patients with stroke

47  
48  
49 496  
50

51 497  
52

53 498  
54

55 499  
56  
57



Figure 1. Differences in complications between patients who spent at least 90% and those who spent less than 90% of their admission in a stroke unit

114x80mm (300 x 300 DPI)

1  
2  
3 **Is length of time in a stroke unit associated with better outcomes for patients with stroke in**  
4 **Australia? An observational study**  
5  
6  
7

8 Doreen Busingye<sup>1</sup>, Monique F. Kilkenny<sup>1,2</sup>, Tara Purvis<sup>1</sup>, Joosup Kim<sup>1,2</sup>, Sandy Middleton<sup>3</sup>,  
9 Bruce C.V. Campbell<sup>4</sup>, Dominique A. Cadilhac<sup>1,2</sup>  
10  
11  
12  
13  
14  
15  
16

17 <sup>1</sup>Translational Public Health and Evaluation Division, Stroke and Ageing Research, School of  
18 Clinical Sciences at Monash Health, Monash University, Clayton, Victoria, Australia

19 <sup>2</sup>Stroke Division, The Florey Institute of Neuroscience and Mental Health, University of  
20 Melbourne, Heidelberg, Victoria, Australia

21 <sup>3</sup>Nursing Research Institute, St Vincent's Health Australia (Sydney) and Australian Catholic  
22 University New South Wales, Australia

23 <sup>4</sup>Department of Medicine and Neurology, Royal Melbourne Hospital, University of Melbourne,  
24 Parkville, Victoria, Australia  
25  
26  
27  
28  
29

30 **\*Corresponding Author**  
31

32 Email: [doreen.busingye@monash.edu](mailto:doreen.busingye@monash.edu), [busingyedoreen@gmail.com](mailto:busingyedoreen@gmail.com) (DB)  
33  
34  
35  
36  
37  
38  
39  
40  
41  
42  
43  
44  
45  
46  
47  
48  
49  
50  
51  
52  
53  
54  
55  
56  
57  
58  
59  
60

**Supplemental Table A. Characteristics of patients with stroke treated in a stroke unit versus those not treated in a stroke unit**

| <b>Treated in a stroke unit</b>                             | <b>Yes<br/>(N= 2739)<br/>n (%)</b> | <b>No<br/>(N=684)<br/>n (%)</b> | <b>p-value</b>   |
|-------------------------------------------------------------|------------------------------------|---------------------------------|------------------|
| <b>Patient characteristics</b>                              |                                    |                                 |                  |
| Age, median (Q1, Q3)                                        | 76 (65, 84)                        | 77 (65, 86)                     | <b>0.03</b>      |
| Male                                                        | 1530 (56)                          | 347 (51)                        | <b>0.02</b>      |
| Living at home prior to stroke                              | 2522 (92)                          | 586 (86)                        | <b>&lt;0.001</b> |
| Independent prior to stroke (mRS 0–2)                       | 2280 (83)                          | 496 (73)                        | <b>&lt;0.001</b> |
| In hospital stroke                                          | 75 (3)                             | 54 (8)                          | <b>&lt;0.001</b> |
| <b>Stroke type</b>                                          |                                    |                                 |                  |
| Ischaemic stroke                                            | 2302 (84)                          | 449 (66)                        | <b>&lt;0.001</b> |
| Haemorrhagic stroke                                         | 286 (10)                           | 163 (24)                        | <b>&lt;0.001</b> |
| Unknown stroke type                                         | 151 (6)                            | 72 (11)                         | <b>&lt;0.001</b> |
| <b>Stroke severity</b>                                      |                                    |                                 |                  |
| Arm weakness on admission                                   | 1675 (62)                          | 352 (59)                        | 0.18             |
| Impaired speech on admission                                | 1582 (59)                          | 333 (57)                        | 0.43             |
| Unable to walk on admission                                 | 1454 (54)                          | 392 (59)                        | <b>0.02</b>      |
| Incontinence at 72 hours of admission                       | 857 (32)                           | 258 (42)                        | <b>&lt;0.001</b> |
| <b>History of comorbidities</b>                             |                                    |                                 |                  |
| Atrial fibrillation                                         |                                    |                                 |                  |
| Hypercholesterolemia                                        | 1058 (44)                          | 225 (43)                        | 0.73             |
| Hypertension                                                | 1820 (70)                          | 419 (70)                        | 0.92             |
| Diabetes mellitus                                           | 669 (27)                           | 160 (29)                        | 0.36             |
| Ischaemic heart disease                                     | 670 (28)                           | 175 (33)                        | <b>0.02</b>      |
| Previous stroke or TIA                                      | 814 (33)                           | 221 (39)                        | <b>0.007</b>     |
| <b>Organisational characteristics</b>                       |                                    |                                 |                  |
| Metropolitan hospital                                       | 2672 (98)                          | 661 (97)                        | 0.18             |
| Private hospital                                            | 217 (8)                            | 37 (5)                          | <b>0.03</b>      |
| Stroke care coordinator present                             | 1626 (59)                          | 446 (65)                        | <b>0.005</b>     |
| Access to onsite neurosurgery                               | 1000 (37)                          | 210 (31)                        | <b>0.004</b>     |
| Dedicated multi-disciplinary team present                   | 2706 (99)                          | 677 (99)                        | 0.69             |
| ED protocols for rapid triage                               | 2625 (96)                          | 643 (94)                        | <b>0.04</b>      |
| Access to on site MRI within 24 hours                       | 2136 (78)                          | 517 (76)                        | 0.18             |
| Stroke team involved in quality improvement in last 2 years | 2416 (88)                          | 543 (79)                        | <b>&lt;0.001</b> |
| Clinical care pathways for managing stroke present          | 2339 (85)                          | 569 (83)                        | 0.15             |
| Access to early supported discharge team                    | 338 (12)                           | 103 (15)                        | 0.06             |
| Patients given discharge care plan                          | 1275 (47)                          | 347 (51)                        | 0.05             |
| Regular multi-disciplinary team meetings                    | 2683 (98)                          | 665 (97)                        | 0.24             |
| Arrangements with ambulance for rapid transfers             | 1897 (73)                          | 498 (78)                        | <b>0.003</b>     |

| <b>Treated in a stroke unit</b>                                                             | <b>Yes<br/>(N= 2739)<br/>n (%)</b> | <b>No<br/>(N=684)<br/>n (%)</b> | <b>p-value</b>   |
|---------------------------------------------------------------------------------------------|------------------------------------|---------------------------------|------------------|
| Offering thrombolysis                                                                       | 2404 (88)                          | 606 (89)                        | 0.55             |
| Program for continuing education of staff                                                   | 2609 (95)                          | 649 (95)                        | 0.69             |
| Number of beds on SU                                                                        |                                    |                                 | <b>&lt;0.001</b> |
| <5                                                                                          | 1246 (45)                          | 380 (56)                        |                  |
| 5-9                                                                                         | 790 (29)                           | 179 (26)                        |                  |
| ≥10                                                                                         | 703 (26)                           | 125 (18)                        |                  |
| Stroke admissions last year ≥100                                                            | 2558 (93)                          | 602 (88)                        | <b>&lt;0.001</b> |
| CT scanning within 3 hours for all patients                                                 | 2690 (98)                          | 676 (99)                        | 0.26             |
| <b>Clinical processes of care</b>                                                           |                                    |                                 |                  |
| Brain scan within 24 hrs of ED arrival                                                      | 2108 (96)                          | 496 (96)                        | 0.35             |
| Assessment in the ED                                                                        | 1071 (44)                          | 127 (28)                        | <b>&lt;0.001</b> |
| Time-critical therapy                                                                       |                                    |                                 |                  |
| Thrombolysis in ischaemic stroke (with exclusions)                                          | 198 (10)                           | 24 (6)                          | <b>0.01</b>      |
| Assessment for rehabilitation by a physiotherapist within 24-48 hours of hospital admission | 1605 (59)                          | 198 (29)                        | <b>&lt;0.001</b> |
| Rehabilitation therapy within 48 hours of initial assessment                                | 1899 (89)                          | 249 (67)                        | <b>&lt;0.001</b> |
| Transition from hospital care                                                               |                                    |                                 |                  |
| Written care plan                                                                           | 1113 (61)                          | 192 (48)                        | <b>&lt;0.001</b> |
| <b>Outcomes</b>                                                                             |                                    |                                 |                  |
| Any severe complication <sup>a</sup>                                                        | 277 (10)                           | 135 (20)                        | <b>&lt;0.001</b> |
| Independent on discharge (mRS 0-2)                                                          | 1285 (51)                          | 263 (51)                        | 0.84             |
| Died in hospital                                                                            | 207 (8)                            | 170 (25)                        | <b>&lt;0.001</b> |
| Discharge destination (survivors)                                                           |                                    |                                 |                  |
| Private residence                                                                           | 1350 (53)                          | 293 (57)                        | 0.13             |
| Residential aged care facility                                                              | 156 (6)                            | 43 (8)                          | 0.07             |
| Inpatient rehabilitation                                                                    | 785 (31)                           | 77 (15)                         | <b>&lt;0.001</b> |
| Other hospital ward                                                                         | 191 (8)                            | 90 (18)                         | <b>&lt;0.001</b> |
| <b>In-hospital complications</b>                                                            |                                    |                                 |                  |
| Aspiration Pneumonia                                                                        | 183 (7)                            | 45 (7)                          | 0.92             |
| Falls                                                                                       | 167 (6)                            | 26 (4)                          | <b>0.02</b>      |
| Fever                                                                                       | 289 (11)                           | 75 (11)                         | 0.75             |
| Urinary tract infections                                                                    | 169 (6)                            | 30 (4)                          | 0.07             |
| New stroke                                                                                  | 47 (2)                             | 38 (6)                          | <b>&lt;0.001</b> |
| Stroke progression                                                                          | 187 (7)                            | 82 (12)                         | <b>&lt;0.001</b> |
| New onset atrial fibrillation                                                               | 155 (6)                            | 28 (4)                          | 0.10             |
| Symptomatic haemorrhagic transformation                                                     | 73 (3)                             | 26 (4)                          | 0.11             |
| Deep vein thrombosis                                                                        | 15 (1)                             | 4 (1)                           | 0.91             |
| Seizures                                                                                    | 67 (2)                             | 34 (5)                          | <b>&lt;0.001</b> |

1  
2  
3 Q1: 1st quartile; Q3: 3rd quartile; ED: emergency department; SU: stroke unit; mRS: modified  
4 Rankin scale. TIA: transient ischaemic attack; MRI: magnetic resonance imaging; <sup>a</sup>a  
5 complication considered incapacitating, life threatening and one that prolongs hospital admission  
6 and patient acuity including pneumonia, falls, fever, urinary tract infection, seizures, deep vein  
7 thrombosis etc.  
8  
9  
10  
11  
12  
13  
14  
15  
16  
17  
18  
19  
20  
21  
22  
23  
24  
25  
26  
27  
28  
29  
30  
31  
32  
33  
34  
35  
36  
37  
38  
39  
40  
41  
42  
43  
44  
45  
46  
47  
48  
49  
50  
51  
52  
53  
54  
55  
56  
57  
58  
59  
60

For peer review only

**Supplemental Table B. Characteristics of patients with stroke who spent at least 90% and those who spent less than 90% of admission in a stroke unit**

| Spent at least 90% of admission in a stroke unit   | Yes<br>(N= 1687)<br>n (%) | No<br>(N=968)<br>n (%) | p-value |
|----------------------------------------------------|---------------------------|------------------------|---------|
| <b>Patient characteristics</b>                     |                           |                        |         |
| Living at home prior to stroke                     | 1543 (91)                 | 898 (93)               | 0.24    |
| Arrived by ambulance <sup>a</sup>                  | 1145 (76)                 | 678 (79)               | 0.21    |
| History of comorbidities                           |                           |                        |         |
| Hypercholesterolemia <sup>a</sup>                  | 653 (44)                  | 366 (43)               | 0.69    |
| Hypertension <sup>b</sup>                          | 1123 (70)                 | 644 (71)               | 0.76    |
| Diabetes mellitus <sup>c</sup>                     | 401 (26)                  | 253 (29)               | 0.14    |
| Previous stroke or TIA <sup>c</sup>                | 513 (34)                  | 277 (32)               | 0.49    |
| Clinical processes of care                         |                           |                        |         |
| Brain scan within 3 hrs of ED arrival <sup>d</sup> | 1053 (77)                 | 567 (75)               | 0.24    |
| <b>Organisational characteristics</b>              |                           |                        |         |
| Dedicated multi-disciplinary team present          | 1669 (99)                 | 953 (98)               | 0.28    |
| ED protocols for rapid triage                      | 1626 (96)                 | 919 (95)               | 0.07    |
| Access to on site MRI within 24 hours              | 1306 (77)                 | 765 (79)               | 0.33    |
| Clinical care pathways for managing stroke present | 1452 (86)                 | 827 (85)               | 0.65    |
| Patients given discharge care plan                 | 772 (46)                  | 464 (48)               | 0.28    |
| Arrangements with ambulance for rapid transfers    | 1163 (73)                 | 675 (73)               | 0.90    |
| Offering thrombolysis                              | 1490 (88)                 | 838 (87)               | 0.19    |
| Standardised processes to assess rehabilitation    | 1346 (80)                 | 749 (77)               | 0.14    |
| Program for continuing education of staff          | 1603 (95)                 | 926 (96)               | 0.46    |
| Neurologist involved in stroke management          | 1224 (73)                 | 720 (74)               | 0.31    |
| CT scanning within 3 hours for all patients        | 1651 (98)                 | 955 (99)               | 0.15    |

ED: emergency department; TIA: transient ischaemic attack; CT: computed tomography; <sup>a</sup>11-15% unknown/not documented data; <sup>b</sup>1-5% unknown/not documented data; <sup>c</sup>6-10% unknown/not documented data; <sup>d</sup>16-20% unknown/not documented data.

**Supplemental Table C. Adherence to processes of care for patients who spent at least 90% and those who spent less than 90% of hospital stay in a stroke unit**

| Spent at least 90% of hospital stay in a stroke unit                                                     | Yes<br>(N= 1687)<br>n (%) | No (N=968)<br>n (%) | p-value          |
|----------------------------------------------------------------------------------------------------------|---------------------------|---------------------|------------------|
| Early assessment                                                                                         |                           |                     |                  |
| Assessment in the ED                                                                                     | 675 (44)                  | 367 (43)            | 0.79             |
| Time-critical therapy                                                                                    |                           |                     |                  |
| Transport by ambulance to hospital able to provide thrombolysis                                          | 1015 (76)                 | 597 (79)            | 0.23             |
| Thrombolysis in ischaemic stroke (with exclusions) <sup>a</sup>                                          | 99 (8)                    | 94 (13)             | <b>&lt;0.001</b> |
| Thrombolysis in ischaemic stroke for those who arrive within 4.5 hours of symptom onset                  | 88 (25)                   | 83 (36)             | <b>0.003</b>     |
| Thrombolysis within 60 minutes of hospital arrival                                                       | 32 (32)                   | 20 (21)             | 0.08             |
| Time (median) from onset of symptoms to thrombolysis (Q1,Q3)                                             | 2.8 (1.9, 3.7)            | 3 (2.3, 3.8)        | 0.10             |
| Early rehabilitation                                                                                     |                           |                     |                  |
| Assessment for rehabilitation by a physiotherapist within 24-48 hours of hospital admission <sup>b</sup> | 1185 (70)                 | 643 (66)            | <b>0.04</b>      |
| Rehabilitation therapy within 48 hours of initial assessment                                             | 1161 (90)                 | 673 (86)            | <b>0.01</b>      |
| Treatment for a rehabilitation goal commencing during an acute hospital admission                        | 1256 (94)                 | 738 (92)            | 0.14             |
| Minimising risk of another stroke                                                                        |                           |                     |                  |
| Discharge on antihypertensive medication <sup>c</sup>                                                    | 701 (75)                  | 404 (77)            | 0.54             |
| Discharge on statin, antihypertensive and antithrombotic medications (ischaemic stroke) <sup>d</sup>     | 526 (66)                  | 285 (66)            | 0.84             |
| Discharge on oral anticoagulants for atrial fibrillation (ischaemic stroke)                              | 144 (68)                  | 87 (63)             | 0.38             |
| Risk factor modification advice before leaving hospital                                                  | 597 (61)                  | 353 (64)            | 0.32             |
| Carer training and support                                                                               |                           |                     |                  |
| Carer support needs assessment                                                                           | 113 (64)                  | 79 (72)             | 0.13             |
| Carer training                                                                                           | 99 (55)                   | 58 (56)             | 0.87             |
| Transition from hospital care                                                                            |                           |                     |                  |
| Written care plan                                                                                        | 699 (62)                  | 377 (59)            | 0.16             |

ED: emergency department; Q1: 1st quartile; Q3: 3rd quartile; SU: stroke unit; <sup>a</sup> patients with pre-morbid functional impairment, recent surgery, major comorbidity, warfarin with INR>1.7, rapidly improving, imaging showing spontaneous reperfusion, other contraindication; <sup>b</sup> recorded as within 48 hours; <sup>c</sup> excludes those contraindicated to treatment; <sup>d</sup> excludes those where treatment was contraindicated or futile, or the patient refused.



## Supplemental Methods

### Propensity score matching with stratification

Since length of stay (LOS) in a stroke unit can be affected by clinical factors and bed availability, propensity score matching was used to minimise confounding by indication. Group comparisons were made within subgroups of patients with similar propensity scores.

A propensity score indicating the probability of being treated on a stroke unit for  $\geq 90\%$  was generated for each participant based on a multivariable logistic regression model. Clinical characteristic variables that were associated with being treated on a stroke unit for  $\geq 90\%$  in the univariable analysis were included in the multivariable logistic regression model. Being transferred to the stroke unit within 3 hours of arrival to the emergency department was included as a marker for bed availability at the time of admission. Severe complications were also included in the model where relevant since this is a marker for clinical characteristics as well as an outcome.

After the propensity scores were generated, patients were stratified into 5 quintiles of the propensity score. Group comparisons were conducted within the 5 quintiles of the propensity score, and overall with quintiles of the propensity score with the poorest matching of variables included in the multivariable logistic regression model used to generate the propensity score. Multivariable logistic regression was conducted for the analysis of binary outcomes with median regression modelling with bootstrap estimated standard errors for LOS. All analyses were adjusted for the propensity score quintile and clustering by hospital.

### Propensity score generated including severe complications as a variable in the multivariable logistic regression model (Model A)

A propensity score was generated for 734 patients who spent  $< 90\%$  of their admission in a stroke unit and 1372 patients who spent  $\geq 90\%$  of their admission in a stroke unit.

| <b>Numbers of patients within the quintiles of the propensity score (Model A)</b> |                                            |                                                           |
|-----------------------------------------------------------------------------------|--------------------------------------------|-----------------------------------------------------------|
|                                                                                   | <b>&lt;90% time spent in a stroke unit</b> | <b><math>\geq 90\%</math> time spent in a stroke unit</b> |
| <b>Propensity score quintiles</b>                                                 | <b>N</b>                                   | <b>N</b>                                                  |
| 1                                                                                 | 185                                        | 237                                                       |
| 2                                                                                 | 170                                        | 251                                                       |
| 3                                                                                 | 147                                        | 274                                                       |
| 4                                                                                 | 143                                        | 278                                                       |
| 5                                                                                 | 89                                         | 332                                                       |
| Total                                                                             | 734                                        | 1372                                                      |

Several differences in the characteristics of patients were apparent between the treatment groups within the quintiles of the propensity score.

Within quintile 1, there were differences between treatment groups in the proportion of patients who were unable to walk on admission ( $p=0.046$ ) and suffered a severe complication while in hospital ( $p=0.013$ ).

1  
2  
3 Within quintile 4, there was a difference between treatment groups in the proportion of patients  
4 who had a previous history of ischaemic heart disease (p=0.007).  
5

6 Within quintile 5, there were difference between treatment groups in the proportion of patients  
7 who had impaired speech on admission (p=0.021) and were transferred to the stroke unit within 3  
8 hours of arrival to the emergency department (p=0.041).  
9

10 In quintiles 1, 2 and 3, all patients were not transferred to the stroke unit within 3 hours of arrival  
11 to the emergency department. In quintiles 2 and 3, there were no patients who experienced severe  
12 complications.  
13  
14  
15

#### 16 **Differences in characteristics between treatment groups within quintiles (Model A)**

|                                                   | p-values for differences in characteristics<br>between treatment groups within quintiles |       |       |              |              |
|---------------------------------------------------|------------------------------------------------------------------------------------------|-------|-------|--------------|--------------|
|                                                   | 1                                                                                        | 2     | 3     | 4            | 5            |
| Age                                               | 0.524                                                                                    | 0.366 | 0.850 | 0.309        | 0.884        |
| Intracerebral Haemorrhage                         | 0.765                                                                                    | 0.989 | 0.391 | 0.831        | 0.665        |
| Arm weakness on admission                         | 0.980                                                                                    | 0.890 | 0.366 | 0.992        | 0.139        |
| Impaired speech on admission                      | 0.432                                                                                    | 0.943 | 0.650 | 0.213        | <b>0.021</b> |
| Unable to walk on admission                       | <b>0.046</b>                                                                             | 0.430 | 0.429 | 0.253        | 0.610        |
| Incontinence at 72 hours of admission             | 0.842                                                                                    | 0.708 | 0.747 | 0.334        | 0.649        |
| Atrial fibrillation                               | 0.281                                                                                    | 0.274 | 0.899 | 0.812        | 0.565        |
| Ischaemic heart disease                           | 0.186                                                                                    | 0.693 | 0.927 | <b>0.007</b> | 0.611        |
| Transferred to SU within 3 hours of ED<br>arrival | -                                                                                        | -     | -     | 0.704        | <b>0.041</b> |
| Severe complication                               | <b>0.013</b>                                                                             | -     | -     | 0.704        | 0.051        |

16  
17  
18  
19  
20  
21  
22  
23  
24  
25  
26  
27  
28  
29  
30  
31  
32  
33  
34  
35  
36  
37 There were no differences between treatment groups within quintiles of the propensity score  
38 where there was good matching of characteristics between treatment groups (Table D). Death was  
39 predicted perfectly in the model within quintile 4.  
40

41  
42 **Table D. Adjusted beta coefficient for differences between treatment groups (Model A)**

| Quintile | $\beta$ coefficient (95% confidence interval), p-value<br>reference category: <90% time spent in a stroke unit |                                        |                                         |
|----------|----------------------------------------------------------------------------------------------------------------|----------------------------------------|-----------------------------------------|
|          | Death                                                                                                          | Discharged to residential<br>aged care | Length of stay<br>(discharged patients) |
| 1        | <b>-0.48 (-0.93, -0.04), 0.03</b>                                                                              | <b>-0.63 (-1.26, -0.01), 0.047</b>     | <b>-5.0 (-9.49, -0.51), 0.03</b>        |
| 2        | -0.41 (-1.50, 0.69), 0.47                                                                                      | 0.03 (-0.83, 0.88), 0.95               | <b>-2.0 (-3.60, -0.40), 0.01</b>        |
| 3        | -0.63 (-3.43, 2.17), 0.66                                                                                      | -0.51 (-1.46, 0.43), 0.29              | <b>-3.0 9-4.41, -1.60), &lt;0.001</b>   |
| 4        | -                                                                                                              | <b>-1.59 (-2.99, -0.20), 0.025</b>     | -1.0 (-2.00, 0.003), 0.051              |
| 5        | -0.66 (-1.52, 0.30), 0.18                                                                                      | <b>-1.98 (-3.40, -0.57), 0.006</b>     | <b>-3.0 (-4.34, -1.67), &lt;0.001</b>   |
| 2 and 3  | -0.43 (-1.46, 0.60), 0.411                                                                                     | -0.15 (-0.81, 0.51), 0.662             | <b>-2.0 (-2.99, -1.01), &lt;0.001</b>   |
| Overall  | <b>-0.43 (-0.82, -0.05), 0.026</b>                                                                             | <b>-0.62 (-1.07, -0.16), 0.008</b>     | <b>-3.0 (-4.01, -1.99), &lt;0.001</b>   |

### Propensity score generated excluding severe complications as a variable in the multivariable logistic regression model (Model B)

A propensity score was generated for 746 patients who spent <90% of their admission in a stroke unit and 1387 patients who spent  $\geq$ 90% of their admission in a stroke unit.

| Numbers of patients within the quintiles of the propensity score (Model B) |                                  |                                        |
|----------------------------------------------------------------------------|----------------------------------|----------------------------------------|
|                                                                            | <90% time spent in a stroke unit | $\geq$ 90% time spent in a stroke unit |
| Propensity score quintiles                                                 | N                                | N                                      |
| 1                                                                          | 186                              | 241                                    |
| 2                                                                          | 169                              | 258                                    |
| 3                                                                          | 148                              | 278                                    |
| 4                                                                          | 147                              | 280                                    |
| 5                                                                          | 96                               | 330                                    |
| Total                                                                      | 746                              | 1387                                   |

There were fewer differences in the characteristics of patients apparent between the treatment groups within the quintiles of the propensity score when severe complications were not considered in the propensity score.

Within quintile 4, there were difference between treatment groups in the proportion of patients who had impaired speech on admission ( $p=0.032$ ) and had a previous history of ischaemic heart disease ( $p=0.011$ ).

Within quintile 5, there was a difference between treatment groups in the proportion of patients who were transferred to the stroke unit within 3 hours of arrival to the emergency department ( $p=0.012$ ).

In quintiles 1, 2, 3 and 4 all patients were not transferred to the stroke unit within 3 hours of arrival to the emergency department.

| <b>Differences in characteristics between treatment groups within quintiles (Model B)</b> |                                                                                              |          |          |              |              |
|-------------------------------------------------------------------------------------------|----------------------------------------------------------------------------------------------|----------|----------|--------------|--------------|
|                                                                                           | <b>p-values for differences in characteristics between treatment groups within quintiles</b> |          |          |              |              |
|                                                                                           | <b>1</b>                                                                                     | <b>2</b> | <b>3</b> | <b>4</b>     | <b>5</b>     |
| Age                                                                                       | 0.346                                                                                        | 0.386    | 0.851    | 0.944        | 0.908        |
| Intracerebral Haemorrhage                                                                 | 0.390                                                                                        | 0.718    | 0.466    | 0.226        | 0.695        |
| Arm weakness on admission                                                                 | 0.544                                                                                        | 0.674    | 0.547    | 0.696        | 0.498        |
| Impaired speech on admission                                                              | 0.299                                                                                        | 0.906    | 0.845    | <b>0.032</b> | 0.095        |
| Unable to walk on admission                                                               | 0.938                                                                                        | 0.228    | 0.512    | 0.135        | 0.275        |
| Incontinence at 72 hours of admission                                                     | 0.552                                                                                        | 0.555    | 0.765    | 0.468        | 0.811        |
| Atrial fibrillation                                                                       | 0.536                                                                                        | 0.349    | 0.945    | 0.912        | 0.675        |
| Ischaemic heart disease                                                                   | 0.363                                                                                        | 0.861    | 0.223    | <b>0.011</b> | 0.780        |
| Transferred to SU within 3 hours of ED arrival                                            | -                                                                                            | -        | -        | -            | <b>0.012</b> |

There were differences between treatment groups within quintiles of the propensity score where there was good matching of characteristics between treatment groups (Table E). There was a reduced chance of severe complications with greater time spent on a stroke unit within quintile 3 (p=0.013). When quintiles 1, 2 and 3 were aggregated, there was a reduced chance of severe complication (p=0.002) and death in hospital (p=0.039) with greater time spent on a stroke unit. Death was predicted perfectly in the model within quintile 4.

**Table E. Adjusted beta coefficient for differences between treatment groups (Model B)**

| <b>β coefficient (95% confidence interval), p-value</b>        |                                              |                                              |                                              |                                                 |
|----------------------------------------------------------------|----------------------------------------------|----------------------------------------------|----------------------------------------------|-------------------------------------------------|
| <b>reference category: &lt;90% time spent in a stroke unit</b> |                                              |                                              |                                              |                                                 |
| <b>Quintile</b>                                                | <b>Severe complication</b>                   | <b>Death</b>                                 | <b>Discharged to residential aged care</b>   | <b>Length of stay (discharged)</b>              |
| 1                                                              | -0.41 (-0.86, 0.03),<br>0.069                | -0.47 (-0.98, 0.04),<br>0.069                | -0.49 (-1.06, 0.08),<br>0.091                | <b>-5.0 (-7.74, -2.26),</b><br><b>&lt;0.001</b> |
| 2                                                              | -0.36 (-1.07, 0.36),<br>0.328                | -0.08 (-0.89, 0.73),<br>0.847                | -0.17 (-0.96, 0.60),<br>0.664                | <b>-2.0 (-3.08, -0.92),</b><br><b>&lt;0.001</b> |
| 3                                                              | <b>-1.14 (-2.04, -0.24),</b><br><b>0.013</b> | -1.05 (-2.86, 0.76),<br>0.255                | -0.67 (-1.64, 0.31),<br>0.183                | <b>-3.0 (-4.01, -1.99),</b><br><b>&lt;0.001</b> |
| 4                                                              | -0.10 (-1.33, 1.14),<br>0.877                | -                                            | -1.35 (-2.88, 0.18),<br>0.083                | <b>-1.0 (-1.87, -0.13),</b><br><b>0.025</b>     |
| 5                                                              | <b>-0.89 (-1.52, -0.15),</b><br><b>0.018</b> | -0.57 (-1.51, 0.36),<br>0.228                | <b>-1.73 (-3.22, -0.24),</b><br><b>0.023</b> | <b>-3.0 (-4.15, -1.85),</b><br><b>&lt;0.001</b> |
| 1, 2 and 3                                                     | <b>-0.49 (-0.81, -0.18),</b><br><b>0.002</b> | <b>-0.40 (-0.77, -0.02),</b><br><b>0.039</b> | -0.42 (-0.86, 0.02),<br>0.058                | <b>-3.0 (-3.77, -2.22),</b><br><b>&lt;0.001</b> |
| Overall                                                        | <b>-0.52 (-0.81, -0.23),</b><br><b>0.001</b> | <b>-0.41 (-0.77, -0.05),</b><br><b>0.026</b> | <b>-0.59 (-1.02, -0.15),</b><br><b>0.008</b> | <b>-3.0 (-3.80, -2.20),</b><br><b>&lt;0.001</b> |

### **Interpretation of propensity score matching analyses**

There is some evidence of benefit from a greater proportion of time spent in a stroke unit when confounding by indication is controlled

**Supplemental Table F. Association between percentages of hospital stay spent in a stroke unit and in-hospital outcomes of patients with stroke**

| Model | Percentage of time spent in a SU (%)                       | aOR <sup>a</sup> | 95% CI               | P-value          |
|-------|------------------------------------------------------------|------------------|----------------------|------------------|
| 1     | Any severe Complications <sup>b</sup>                      |                  |                      |                  |
|       | < 50                                                       | 1                |                      |                  |
|       | ≥50 to <60                                                 | 1.35             | (0.68, 2.69)         | 0.40             |
|       | ≥60 to <70                                                 | 0.56             | (0.23, 1.36)         | 0.20             |
|       | ≥70 to <80                                                 | 0.54             | (0.23, 1.26)         | 0.15             |
|       | ≥80 to <90                                                 | 0.51             | (0.25, 1.05)         | 0.07             |
|       | ≥90                                                        | <b>0.47</b>      | <b>(0.30, 0.74)</b>  | <b>0.001</b>     |
| 2     | LOS less than or equal to median LOS (5 days) - discharged |                  |                      |                  |
|       | < 50                                                       | 1                |                      |                  |
|       | ≥50 to <60                                                 | <b>7.31</b>      | <b>(4.12, 12.97)</b> | <b>&lt;0.001</b> |
|       | ≥60 to <70                                                 | <b>9.15</b>      | <b>(5.14, 16.27)</b> | <b>&lt;0.001</b> |
|       | ≥70 to <80                                                 | <b>6.31</b>      | <b>(3.52, 11.31)</b> | <b>&lt;0.001</b> |
|       | ≥80 to <90                                                 | <b>2.27</b>      | <b>(1.28, 4.02)</b>  | <b>0.005</b>     |
|       | ≥90                                                        | <b>9.71</b>      | <b>(6.42, 14.69)</b> | <b>&lt;0.001</b> |
| 3     | Independent at discharge (mRS 0-2)                         |                  |                      |                  |
|       | < 50                                                       | 1                |                      |                  |
|       | ≥50 to <60                                                 | 1.67             | (0.90, 3.10)         | 0.10             |
|       | ≥60 to <70                                                 | 1.61             | (0.89, 2.91)         | 0.11             |
|       | ≥70 to <80                                                 | <b>2.02</b>      | <b>(1.08, 3.79)</b>  | <b>0.03</b>      |
|       | ≥80 to <90                                                 | 1.07             | (0.60, 1.90)         | 0.82             |
|       | ≥90                                                        | <b>1.57</b>      | <b>(1.07, 2.28)</b>  | <b>0.02</b>      |

SU: stroke unit; aOR: adjusted odds ratio; CI: confidence interval; LOS: length of stay; mRS: modified Rankin scale. <sup>a</sup>Models adjusted for age, gender, premorbid function, stroke type, stroke severity and past history of atrial fibrillation. <sup>b</sup>a complication considered incapacitating, life threatening and one that prolongs hospital admission and patient acuity including pneumonia, falls, fever, urinary tract infection, seizures, deep vein thrombosis etc.

STROBE Statement—Checklist of items that should be included in reports of *cross-sectional studies*

|                              | <b>Item No</b> | <b>Recommendation</b>                                                                                                                                                                                                                                                                                                                                                                                                                                     |
|------------------------------|----------------|-----------------------------------------------------------------------------------------------------------------------------------------------------------------------------------------------------------------------------------------------------------------------------------------------------------------------------------------------------------------------------------------------------------------------------------------------------------|
| <b>Title and abstract</b>    | 1              | (a) Indicate the study's design with a commonly used term in the title or the abstract<br>(b) Provide in the abstract an informative and balanced summary of what was done and what was found ( <b>Page 2</b> )                                                                                                                                                                                                                                           |
| <b>Introduction</b>          |                |                                                                                                                                                                                                                                                                                                                                                                                                                                                           |
| Background/rationale         | 2              | Explain the scientific background and rationale for the investigation being reported ( <b>Page 4</b> )                                                                                                                                                                                                                                                                                                                                                    |
| Objectives                   | 3              | State specific objectives, including any prespecified hypotheses ( <b>Page 4</b> )                                                                                                                                                                                                                                                                                                                                                                        |
| <b>Methods</b>               |                |                                                                                                                                                                                                                                                                                                                                                                                                                                                           |
| Study design                 | 4              | Present key elements of study design early in the paper ( <b>Page 5</b> )                                                                                                                                                                                                                                                                                                                                                                                 |
| Setting                      | 5              | Describe the setting, locations, and relevant dates, including periods of recruitment, exposure, follow-up, and data collection ( <b>Page 5 &amp; 6</b> )                                                                                                                                                                                                                                                                                                 |
| Participants                 | 6              | (a) Give the eligibility criteria, and the sources and methods of selection of participants ( <b>Page 6</b> )                                                                                                                                                                                                                                                                                                                                             |
| Variables                    | 7              | Clearly define all outcomes, exposures, predictors, potential confounders, and effect modifiers. Give diagnostic criteria, if applicable ( <b>Page 6 &amp; 7</b> )                                                                                                                                                                                                                                                                                        |
| Data sources/<br>measurement | 8*             | For each variable of interest, give sources of data and details of methods of assessment (measurement). Describe comparability of assessment methods if there is more than one group ( <b>Page 6 &amp; 7</b> )                                                                                                                                                                                                                                            |
| Bias                         | 9              | Describe any efforts to address potential sources of bias ( <b>Page 7 &amp; 8</b> )                                                                                                                                                                                                                                                                                                                                                                       |
| Study size                   | 10             | Explain how the study size was arrived at ( <b>Page 5</b> )                                                                                                                                                                                                                                                                                                                                                                                               |
| Quantitative variables       | 11             | Explain how quantitative variables were handled in the analyses. If applicable, describe which groupings were chosen and why ( <b>Page 6 &amp; 7</b> )                                                                                                                                                                                                                                                                                                    |
| Statistical methods          | 12             | (a) Describe all statistical methods, including those used to control for confounding ( <b>Page 7 &amp; 8</b> )<br>(b) Describe any methods used to examine subgroups and interactions ( <b>Page 7 &amp; 8</b> )<br>(c) Explain how missing data were addressed ( <b>Page 6 &amp; 7</b> )<br>(d) If applicable, describe analytical methods taking account of sampling strategy ( <b>N/A</b> )<br>(e) Describe any sensitivity analyses ( <b>Page 8</b> ) |
| <b>Results</b>               |                |                                                                                                                                                                                                                                                                                                                                                                                                                                                           |
| Participants                 | 13*            | (a) Report numbers of individuals at each stage of study—eg numbers potentially eligible, examined for eligibility, confirmed eligible, included in the study, completing follow-up, and analysed ( <b>Page 9</b> )<br>(b) Give reasons for non-participation at each stage ( <b>N/A</b> )<br>(c) Consider use of a flow diagram ( <b>N/A</b> )                                                                                                           |
| Descriptive data             | 14*            | (a) Give characteristics of study participants (eg demographic, clinical, social) and information on exposures and potential confounders ( <b>Page 9, Table 1</b> )<br>(b) Indicate number of participants with missing data for each variable of interest ( <b>Table 1</b> )                                                                                                                                                                             |
| Outcome data                 | 15*            | Report numbers of outcome events or summary measures ( <b>Page 12, 13, Table 2, Table 3</b> )                                                                                                                                                                                                                                                                                                                                                             |
| Main results                 | 16             | (a) Give unadjusted estimates and, if applicable, confounder-adjusted estimates and their precision (eg, 95% confidence interval). Make clear which confounders were adjusted for and why they were included ( <b>Page 12, Page 13, Page 14, Table 2,</b>                                                                                                                                                                                                 |

**Table 3)**

|                          |    |                                                                                                                                                                                               |
|--------------------------|----|-----------------------------------------------------------------------------------------------------------------------------------------------------------------------------------------------|
|                          |    | (b) Report category boundaries when continuous variables were categorized (N/A)                                                                                                               |
|                          |    | (c) If relevant, consider translating estimates of relative risk into absolute risk for a meaningful time period (N/A)                                                                        |
| Other analyses           | 17 | Report other analyses done—eg analyses of subgroups and interactions, and sensitivity analyses (Page 13, Supplemental Table D, E, F)                                                          |
| <b>Discussion</b>        |    |                                                                                                                                                                                               |
| Key results              | 18 | Summarise key results with reference to study objectives (Page 16)                                                                                                                            |
| Limitations              | 19 | Discuss limitations of the study, taking into account sources of potential bias or imprecision. Discuss both direction and magnitude of any potential bias (Page 17 & 19)                     |
| Interpretation           | 20 | Give a cautious overall interpretation of results considering objectives, limitations, multiplicity of analyses, results from similar studies, and other relevant evidence (Page 17, Page 19) |
| Generalisability         | 21 | Discuss the generalisability (external validity) of the study results (Page 17)                                                                                                               |
| <b>Other information</b> |    |                                                                                                                                                                                               |
| Funding                  | 22 | Give the source of funding and the role of the funders for the present study and, if applicable, for the original study on which the present article is based (Page 20)                       |

\*Give information separately for exposed and unexposed groups.

**Note:** An Explanation and Elaboration article discusses each checklist item and gives methodological background and published examples of transparent reporting. The STROBE checklist is best used in conjunction with this article (freely available on the Web sites of PLoS Medicine at <http://www.plosmedicine.org/>, Annals of Internal Medicine at <http://www.annals.org/>, and Epidemiology at <http://www.epidem.com/>). Information on the STROBE Initiative is available at [www.strobe-statement.org](http://www.strobe-statement.org).
