# Supplementary material for: Is length of time in a stroke unit associated with better outcomes for patients with stroke in Australia? An observational study
Source: PubMed Central journal article supplement — BMJ Open. 2018 Nov 12;8(11):e022536. doi: 10.1136/bmjopen-2018-022536 (PMC6252690; doi:10.1136/bmjopen-2018-022536), 2018-11-12
Supplement: bmjopen-2018-022536supp001.pdf [file bmjopen-2018-022536supp001.pdf]

## **Is length of time in a stroke unit associated with better outcomes for patients with stroke in Australia? An observational study**

Doreen Busingye<sup>1</sup>, Monique F. Kilkenny<sup>1,2</sup>, Tara Purvis<sup>1</sup>, Joosup Kim<sup>1,2</sup>, Sandy Middleton<sup>3</sup>, Bruce C.V. Campbell<sup>4</sup>, Dominique A. Cadilhac<sup>1,2</sup>

<sup>1</sup>Translational Public Health and Evaluation Division, Stroke and Ageing Research, School of Clinical Sciences at Monash Health, Monash University, Clayton, Victoria, Australia

<sup>2</sup>Stroke Division, The Florey Institute of Neuroscience and Mental Health, University of Melbourne, Heidelberg, Victoria, Australia

<sup>3</sup>Nursing Research Institute, St Vincent's Health Australia (Sydney) and Australian Catholic University New South Wales, Australia

<sup>4</sup>Department of Medicine and Neurology, Royal Melbourne Hospital, University of Melbourne, Parkville, Victoria, Australia

### **\*Corresponding Author**

Email: [doreen.busingye@monash.edu](mailto:doreen.busingye@monash.edu), [busingyedoreen@gmail.com](mailto:busingyedoreen@gmail.com) (DB)

**Supplemental Table A. Characteristics of patients with stroke treated in a stroke unit versus those not treated in a stroke unit**

| <b>Treated in a stroke unit</b>                             | <b>Yes<br/>(N= 2739)<br/>n (%)</b> | <b>No<br/>(N=684)<br/>n (%)</b> | <b>p-value</b>   |
|-------------------------------------------------------------|------------------------------------|---------------------------------|------------------|
| <b>Patient characteristics</b>                              |                                    |                                 |                  |
| Age, median (Q1, Q3)                                        | 76 (65, 84)                        | 77 (65, 86)                     | <b>0.03</b>      |
| Male                                                        | 1530 (56)                          | 347 (51)                        | <b>0.02</b>      |
| Living at home prior to stroke                              | 2522 (92)                          | 586 (86)                        | <b>&lt;0.001</b> |
| Independent prior to stroke (mRS 0–2)                       | 2280 (83)                          | 496 (73)                        | <b>&lt;0.001</b> |
| In hospital stroke                                          | 75 (3)                             | 54 (8)                          | <b>&lt;0.001</b> |
| <b>Stroke type</b>                                          |                                    |                                 |                  |
| Ischaemic stroke                                            | 2302 (84)                          | 449 (66)                        | <b>&lt;0.001</b> |
| Haemorrhagic stroke                                         | 286 (10)                           | 163 (24)                        | <b>&lt;0.001</b> |
| Unknown stroke type                                         | 151 (6)                            | 72 (11)                         | <b>&lt;0.001</b> |
| <b>Stroke severity</b>                                      |                                    |                                 |                  |
| Arm weakness on admission                                   | 1675 (62)                          | 352 (59)                        | 0.18             |
| Impaired speech on admission                                | 1582 (59)                          | 333 (57)                        | 0.43             |
| Unable to walk on admission                                 | 1454 (54)                          | 392 (59)                        | <b>0.02</b>      |
| Incontinence at 72 hours of admission                       | 857 (32)                           | 258 (42)                        | <b>&lt;0.001</b> |
| <b>History of comorbidities</b>                             |                                    |                                 |                  |
| Atrial fibrillation                                         |                                    |                                 |                  |
| Hypercholesterolemia                                        | 1058 (44)                          | 225 (43)                        | 0.73             |
| Hypertension                                                | 1820 (70)                          | 419 (70)                        | 0.92             |
| Diabetes mellitus                                           | 669 (27)                           | 160 (29)                        | 0.36             |
| Ischaemic heart disease                                     | 670 (28)                           | 175 (33)                        | <b>0.02</b>      |
| Previous stroke or TIA                                      | 814 (33)                           | 221 (39)                        | <b>0.007</b>     |
| <b>Organisational characteristics</b>                       |                                    |                                 |                  |
| Metropolitan hospital                                       | 2672 (98)                          | 661 (97)                        | 0.18             |
| Private hospital                                            | 217 (8)                            | 37 (5)                          | <b>0.03</b>      |
| Stroke care coordinator present                             | 1626 (59)                          | 446 (65)                        | <b>0.005</b>     |
| Access to onsite neurosurgery                               | 1000 (37)                          | 210 (31)                        | <b>0.004</b>     |
| Dedicated multi-disciplinary team present                   | 2706 (99)                          | 677 (99)                        | 0.69             |
| ED protocols for rapid triage                               | 2625 (96)                          | 643 (94)                        | <b>0.04</b>      |
| Access to on site MRI within 24 hours                       | 2136 (78)                          | 517 (76)                        | 0.18             |
| Stroke team involved in quality improvement in last 2 years | 2416 (88)                          | 543 (79)                        | <b>&lt;0.001</b> |
| Clinical care pathways for managing stroke present          | 2339 (85)                          | 569 (83)                        | 0.15             |
| Access to early supported discharge team                    | 338 (12)                           | 103 (15)                        | 0.06             |
| Patients given discharge care plan                          | 1275 (47)                          | 347 (51)                        | 0.05             |
| Regular multi-disciplinary team meetings                    | 2683 (98)                          | 665 (97)                        | 0.24             |
| Arrangements with ambulance for rapid transfers             | 1897 (73)                          | 498 (78)                        | <b>0.003</b>     |

| <b>Treated in a stroke unit</b>                                                             | <b>Yes<br/>(N= 2739)<br/>n (%)</b> | <b>No<br/>(N=684)<br/>n (%)</b> | <b>p-value</b>   |
|---------------------------------------------------------------------------------------------|------------------------------------|---------------------------------|------------------|
| Offering thrombolysis                                                                       | 2404 (88)                          | 606 (89)                        | 0.55             |
| Program for continuing education of staff                                                   | 2609 (95)                          | 649 (95)                        | 0.69             |
| Number of beds on SU                                                                        |                                    |                                 | <b>&lt;0.001</b> |
| <5                                                                                          | 1246 (45)                          | 380 (56)                        |                  |
| 5-9                                                                                         | 790 (29)                           | 179 (26)                        |                  |
| ≥10                                                                                         | 703 (26)                           | 125 (18)                        |                  |
| Stroke admissions last year ≥100                                                            | 2558 (93)                          | 602 (88)                        | <b>&lt;0.001</b> |
| CT scanning within 3 hours for all patients                                                 | 2690 (98)                          | 676 (99)                        | 0.26             |
| <b>Clinical processes of care</b>                                                           |                                    |                                 |                  |
| Brain scan within 24 hrs of ED arrival                                                      | 2108 (96)                          | 496 (96)                        | 0.35             |
| Assessment in the ED                                                                        | 1071 (44)                          | 127 (28)                        | <b>&lt;0.001</b> |
| Time-critical therapy                                                                       |                                    |                                 |                  |
| Thrombolysis in ischaemic stroke (with exclusions)                                          | 198 (10)                           | 24 (6)                          | <b>0.01</b>      |
| Assessment for rehabilitation by a physiotherapist within 24-48 hours of hospital admission | 1605 (59)                          | 198 (29)                        | <b>&lt;0.001</b> |
| Rehabilitation therapy within 48 hours of initial assessment                                | 1899 (89)                          | 249 (67)                        | <b>&lt;0.001</b> |
| Transition from hospital care                                                               |                                    |                                 |                  |
| Written care plan                                                                           | 1113 (61)                          | 192 (48)                        | <b>&lt;0.001</b> |
| <b>Outcomes</b>                                                                             |                                    |                                 |                  |
| Any severe complication <sup>a</sup>                                                        | 277 (10)                           | 135 (20)                        | <b>&lt;0.001</b> |
| Independent on discharge (mRS 0-2)                                                          | 1285 (51)                          | 263 (51)                        | 0.84             |
| Died in hospital                                                                            | 207 (8)                            | 170 (25)                        | <b>&lt;0.001</b> |
| Discharge destination (survivors)                                                           |                                    |                                 |                  |
| Private residence                                                                           | 1350 (53)                          | 293 (57)                        | 0.13             |
| Residential aged care facility                                                              | 156 (6)                            | 43 (8)                          | 0.07             |
| Inpatient rehabilitation                                                                    | 785 (31)                           | 77 (15)                         | <b>&lt;0.001</b> |
| Other hospital ward                                                                         | 191 (8)                            | 90 (18)                         | <b>&lt;0.001</b> |
| <b>In-hospital complications</b>                                                            |                                    |                                 |                  |
| Aspiration Pneumonia                                                                        | 183 (7)                            | 45 (7)                          | 0.92             |
| Falls                                                                                       | 167 (6)                            | 26 (4)                          | <b>0.02</b>      |
| Fever                                                                                       | 289 (11)                           | 75 (11)                         | 0.75             |
| Urinary tract infections                                                                    | 169 (6)                            | 30 (4)                          | 0.07             |
| New stroke                                                                                  | 47 (2)                             | 38 (6)                          | <b>&lt;0.001</b> |
| Stroke progression                                                                          | 187 (7)                            | 82 (12)                         | <b>&lt;0.001</b> |
| New onset atrial fibrillation                                                               | 155 (6)                            | 28 (4)                          | 0.10             |
| Symptomatic haemorrhagic transformation                                                     | 73 (3)                             | 26 (4)                          | 0.11             |
| Deep vein thrombosis                                                                        | 15 (1)                             | 4 (1)                           | 0.91             |
| Seizures                                                                                    | 67 (2)                             | 34 (5)                          | <b>&lt;0.001</b> |

Q1: 1st quartile; Q3: 3rd quartile; ED: emergency department; SU: stroke unit; mRS: modified Rankin scale. TIA: transient ischaemic attack; MRI: magnetic resonance imaging; <sup>a</sup>a complication considered incapacitating, life threatening and one that prolongs hospital admission and patient acuity including pneumonia, falls, fever, urinary tract infection, seizures, deep vein thrombosis etc.

**Supplemental Table B. Characteristics of patients with stroke who spent at least 90% and those who spent less than 90% of admission in a stroke unit**

| <b>Spent at least 90% of admission in a stroke unit</b> | <b>Yes<br/>(N= 1687)<br/>n (%)</b> | <b>No<br/>(N=968)<br/>n (%)</b> | <b>p-value</b> |
|---------------------------------------------------------|------------------------------------|---------------------------------|----------------|
| <b>Patient characteristics</b>                          |                                    |                                 |                |
| Living at home prior to stroke                          | 1543 (91)                          | 898 (93)                        | 0.24           |
| Arrived by ambulance <sup>a</sup>                       | 1145 (76)                          | 678 (79)                        | 0.21           |
| History of comorbidities                                |                                    |                                 |                |
| Hypercholesterolemia <sup>a</sup>                       | 653 (44)                           | 366 (43)                        | 0.69           |
| Hypertension <sup>b</sup>                               | 1123 (70)                          | 644 (71)                        | 0.76           |
| Diabetes mellitus <sup>c</sup>                          | 401 (26)                           | 253 (29)                        | 0.14           |
| Previous stroke or TIA <sup>c</sup>                     | 513 (34)                           | 277 (32)                        | 0.49           |
| Clinical processes of care                              |                                    |                                 |                |
| Brain scan within 3 hrs of ED arrival <sup>d</sup>      | 1053 (77)                          | 567 (75)                        | 0.24           |
| <b>Organisational characteristics</b>                   |                                    |                                 |                |
| Dedicated multi-disciplinary team present               | 1669 (99)                          | 953 (98)                        | 0.28           |
| ED protocols for rapid triage                           | 1626 (96)                          | 919 (95)                        | 0.07           |
| Access to on site MRI within 24 hours                   | 1306 (77)                          | 765 (79)                        | 0.33           |
| Clinical care pathways for managing stroke present      | 1452 (86)                          | 827 (85)                        | 0.65           |
| Patients given discharge care plan                      | 772 (46)                           | 464 (48)                        | 0.28           |
| Arrangements with ambulance for rapid transfers         | 1163 (73)                          | 675 (73)                        | 0.90           |
| Offering thrombolysis                                   | 1490 (88)                          | 838 (87)                        | 0.19           |
| Standardised processes to assess rehabilitation         | 1346 (80)                          | 749 (77)                        | 0.14           |
| Program for continuing education of staff               | 1603 (95)                          | 926 (96)                        | 0.46           |
| Neurologist involved in stroke management               | 1224 (73)                          | 720 (74)                        | 0.31           |
| CT scanning within 3 hours for all patients             | 1651 (98)                          | 955 (99)                        | 0.15           |

ED: emergency department; TIA: transient ischaemic attack; CT: computed tomography; <sup>a</sup>11-15% unknown/not documented data; <sup>b</sup>1-5% unknown/not documented data; <sup>c</sup>6-10% unknown/not documented data; <sup>d</sup>16-20% unknown/not documented data.

**Supplemental Table C. Adherence to processes of care for patients who spent at least 90% and those who spent less than 90% of hospital stay in a stroke unit**

| Spent at least 90% of hospital stay in a stroke unit                                                     | Yes<br>(N= 1687)<br>n (%) | No (N=968)<br>n (%) | p-value          |
|----------------------------------------------------------------------------------------------------------|---------------------------|---------------------|------------------|
| Early assessment                                                                                         |                           |                     |                  |
| Assessment in the ED                                                                                     | 675 (44)                  | 367 (43)            | 0.79             |
| Time-critical therapy                                                                                    |                           |                     |                  |
| Transport by ambulance to hospital able to provide thrombolysis                                          | 1015 (76)                 | 597 (79)            | 0.23             |
| Thrombolysis in ischaemic stroke (with exclusions) <sup>a</sup>                                          | 99 (8)                    | 94 (13)             | <b>&lt;0.001</b> |
| Thrombolysis in ischaemic stroke for those who arrive within 4.5 hours of symptom onset                  | 88 (25)                   | 83 (36)             | <b>0.003</b>     |
| Thrombolysis within 60 minutes of hospital arrival                                                       | 32 (32)                   | 20 (21)             | 0.08             |
| Time (median) from onset of symptoms to thrombolysis (Q1,Q3)                                             | 2.8 (1.9, 3.7)            | 3 (2.3, 3.8)        | 0.10             |
| Early rehabilitation                                                                                     |                           |                     |                  |
| Assessment for rehabilitation by a physiotherapist within 24-48 hours of hospital admission <sup>b</sup> | 1185 (70)                 | 643 (66)            | <b>0.04</b>      |
| Rehabilitation therapy within 48 hours of initial assessment                                             | 1161 (90)                 | 673 (86)            | <b>0.01</b>      |
| Treatment for a rehabilitation goal commencing during an acute hospital admission                        | 1256 (94)                 | 738 (92)            | 0.14             |
| Minimising risk of another stroke                                                                        |                           |                     |                  |
| Discharge on antihypertensive medication <sup>c</sup>                                                    | 701 (75)                  | 404 (77)            | 0.54             |
| Discharge on statin, antihypertensive and antithrombotic medications (ischaemic stroke) <sup>d</sup>     | 526 (66)                  | 285 (66)            | 0.84             |
| Discharge on oral anticoagulants for atrial fibrillation (ischaemic stroke)                              | 144 (68)                  | 87 (63)             | 0.38             |
| Risk factor modification advice before leaving hospital                                                  | 597 (61)                  | 353 (64)            | 0.32             |
| Carer training and support                                                                               |                           |                     |                  |
| Carer support needs assessment                                                                           | 113 (64)                  | 79 (72)             | 0.13             |
| Carer training                                                                                           | 99 (55)                   | 58 (56)             | 0.87             |
| Transition from hospital care                                                                            |                           |                     |                  |
| Written care plan                                                                                        | 699 (62)                  | 377 (59)            | 0.16             |

ED: emergency department; Q1: 1st quartile; Q3: 3rd quartile; SU: stroke unit; <sup>a</sup> patients with pre-morbid functional impairment, recent surgery, major comorbidity, warfarin with INR>1.7, rapidly improving, imaging showing spontaneous reperfusion, other contraindication; <sup>b</sup> recorded as within 48 hours; <sup>c</sup> excludes those contraindicated to treatment; <sup>d</sup> excludes those where treatment was contraindicated or futile, or the patient refused.

## Supplemental Methods

### Propensity score matching with stratification

Since length of stay (LOS) in a stroke unit can be affected by clinical factors and bed availability, propensity score matching was used to minimise confounding by indication. Group comparisons were made within subgroups of patients with similar propensity scores.

A propensity score indicating the probability of being treated on a stroke unit for  $\geq 90\%$  was generated for each participant based on a multivariable logistic regression model. Clinical characteristic variables that were associated with being treated on a stroke unit for  $\geq 90\%$  in the univariable analysis were included in the multivariable logistic regression model. Being transferred to the stroke unit within 3 hours of arrival to the emergency department was included as a marker for bed availability at the time of admission. Severe complications were also included in the model where relevant since this is a marker for clinical characteristics as well as an outcome.

After the propensity scores were generated, patients were stratified into 5 quintiles of the propensity score. Group comparisons were conducted within the 5 quintiles of the propensity score, and overall with quintiles of the propensity score with the poorest matching of variables included in the multivariable logistic regression model used to generate the propensity score. Multivariable logistic regression was conducted for the analysis of binary outcomes with median regression modelling with bootstrap estimated standard errors for LOS. All analyses were adjusted for the propensity score quintile and clustering by hospital.

### Propensity score generated including severe complications as a variable in the multivariable logistic regression model (Model A)

A propensity score was generated for 734 patients who spent  $<90\%$  of their admission in a stroke unit and 1372 patients who spent  $\geq 90\%$  of their admission in a stroke unit.

| <b>Numbers of patients within the quintiles of the propensity score (Model A)</b> |                                                          |                                                           |
|-----------------------------------------------------------------------------------|----------------------------------------------------------|-----------------------------------------------------------|
|                                                                                   | <b><math>&lt;90\%</math> time spent in a stroke unit</b> | <b><math>\geq 90\%</math> time spent in a stroke unit</b> |
| <b>Propensity score quintiles</b>                                                 | <b>N</b>                                                 | <b>N</b>                                                  |
| 1                                                                                 | 185                                                      | 237                                                       |
| 2                                                                                 | 170                                                      | 251                                                       |
| 3                                                                                 | 147                                                      | 274                                                       |
| 4                                                                                 | 143                                                      | 278                                                       |
| 5                                                                                 | 89                                                       | 332                                                       |
| Total                                                                             | 734                                                      | 1372                                                      |

Several differences in the characteristics of patients were apparent between the treatment groups within the quintiles of the propensity score.

Within quintile 1, there were differences between treatment groups in the proportion of patients who were unable to walk on admission ( $p=0.046$ ) and suffered a severe complication while in hospital ( $p=0.013$ ).

Within quintile 4, there was a difference between treatment groups in the proportion of patients who had a previous history of ischaemic heart disease (p=0.007).

Within quintile 5, there were difference between treatment groups in the proportion of patients who had impaired speech on admission (p=0.021) and were transferred to the stroke unit within 3 hours of arrival to the emergency department (p=0.041).

In quintiles 1, 2 and 3, all patients were not transferred to the stroke unit within 3 hours of arrival to the emergency department. In quintiles 2 and 3, there were no patients who experienced severe complications.

| <b>Differences in characteristics between treatment groups within quintiles (Model A)</b> |                                                                                              |          |          |              |              |
|-------------------------------------------------------------------------------------------|----------------------------------------------------------------------------------------------|----------|----------|--------------|--------------|
|                                                                                           | <b>p-values for differences in characteristics between treatment groups within quintiles</b> |          |          |              |              |
|                                                                                           | <b>1</b>                                                                                     | <b>2</b> | <b>3</b> | <b>4</b>     | <b>5</b>     |
| Age                                                                                       | 0.524                                                                                        | 0.366    | 0.850    | 0.309        | 0.884        |
| Intracerebral Haemorrhage                                                                 | 0.765                                                                                        | 0.989    | 0.391    | 0.831        | 0.665        |
| Arm weakness on admission                                                                 | 0.980                                                                                        | 0.890    | 0.366    | 0.992        | 0.139        |
| Impaired speech on admission                                                              | 0.432                                                                                        | 0.943    | 0.650    | 0.213        | <b>0.021</b> |
| Unable to walk on admission                                                               | <b>0.046</b>                                                                                 | 0.430    | 0.429    | 0.253        | 0.610        |
| Incontinence at 72 hours of admission                                                     | 0.842                                                                                        | 0.708    | 0.747    | 0.334        | 0.649        |
| Atrial fibrillation                                                                       | 0.281                                                                                        | 0.274    | 0.899    | 0.812        | 0.565        |
| Ischaemic heart disease                                                                   | 0.186                                                                                        | 0.693    | 0.927    | <b>0.007</b> | 0.611        |
| Transferred to SU within 3 hours of ED arrival                                            | -                                                                                            | -        | -        | 0.704        | <b>0.041</b> |
| Severe complication                                                                       | <b>0.013</b>                                                                                 | -        | -        | 0.704        | 0.051        |

There were no differences between treatment groups within quintiles of the propensity score where there was good matching of characteristics between treatment groups (Table D). Death was predicted perfectly in the model within quintile 4.

| <b>Table D. Adjusted beta coefficient for differences between treatment groups (Model A)</b> |                                    |                                            |                                             |
|----------------------------------------------------------------------------------------------|------------------------------------|--------------------------------------------|---------------------------------------------|
| <b>β coefficient (95% confidence interval), p-value</b>                                      |                                    |                                            |                                             |
| <b>reference category: &lt;90% time spent in a stroke unit</b>                               |                                    |                                            |                                             |
| <b>Quintile</b>                                                                              | <b>Death</b>                       | <b>Discharged to residential aged care</b> | <b>Length of stay (discharged patients)</b> |
| 1                                                                                            | <b>-0.48 (-0.93, -0.04), 0.03</b>  | <b>-0.63 (-1.26, -0.01), 0.047</b>         | <b>-5.0 (-9.49, -0.51), 0.03</b>            |
| 2                                                                                            | -0.41 (-1.50, 0.69), 0.47          | 0.03 (-0.83, 0.88), 0.95                   | <b>-2.0 (-3.60, -0.40), 0.01</b>            |
| 3                                                                                            | -0.63 (-3.43, 2.17), 0.66          | -0.51 (-1.46, 0.43), 0.29                  | <b>-3.0 9-4.41, -1.60), &lt;0.001</b>       |
| 4                                                                                            | -                                  | <b>-1.59 (-2.99, -0.20), 0.025</b>         | -1.0 (-2.00, 0.003), 0.051                  |
| 5                                                                                            | -0.66 (-1.52, 0.30), 0.18          | <b>-1.98 (-3.40, -0.57), 0.006</b>         | <b>-3.0 (-4.34, -1.67), &lt;0.001</b>       |
| 2 and 3                                                                                      | -0.43 (-1.46, 0.60), 0.411         | -0.15 (-0.81, 0.51), 0.662                 | <b>-2.0 (-2.99, -1.01), &lt;0.001</b>       |
| Overall                                                                                      | <b>-0.43 (-0.82, -0.05), 0.026</b> | <b>-0.62 (-1.07, -0.16), 0.008</b>         | <b>-3.0 (-4.01, -1.99), &lt;0.001</b>       |



**Propensity score generated excluding severe complications as a variable in the multivariable logistic regression model (Model B)**

A propensity score was generated for 746 patients who spent <90% of their admission in a stroke unit and 1387 patients who spent  $\geq$ 90% of their admission in a stroke unit.

| <b>Numbers of patients within the quintiles of the propensity score (Model B)</b> |                                            |                                                         |
|-----------------------------------------------------------------------------------|--------------------------------------------|---------------------------------------------------------|
|                                                                                   | <b>&lt;90% time spent in a stroke unit</b> | <b><math>\geq</math>90% time spent in a stroke unit</b> |
| <b>Propensity score quintiles</b>                                                 | <b>N</b>                                   | <b>N</b>                                                |
| 1                                                                                 | 186                                        | 241                                                     |
| 2                                                                                 | 169                                        | 258                                                     |
| 3                                                                                 | 148                                        | 278                                                     |
| 4                                                                                 | 147                                        | 280                                                     |
| 5                                                                                 | 96                                         | 330                                                     |
| Total                                                                             | 746                                        | 1387                                                    |

There were fewer differences in the characteristics of patients apparent between the treatment groups within the quintiles of the propensity score when severe complications were not considered in the propensity score.

Within quintile 4, there were difference between treatment groups in the proportion of patients who had impaired speech on admission ( $p=0.032$ ) and had a previous history of ischaemic heart disease ( $p=0.011$ ).

Within quintile 5, there was a difference between treatment groups in the proportion of patients who were transferred to the stroke unit within 3 hours of arrival to the emergency department ( $p=0.012$ ).

In quintiles 1, 2, 3 and 4 all patients were not transferred to the stroke unit within 3 hours of arrival to the emergency department.

| <b>Differences in characteristics between treatment groups within quintiles (Model B)</b> |                                                                                              |          |          |              |              |
|-------------------------------------------------------------------------------------------|----------------------------------------------------------------------------------------------|----------|----------|--------------|--------------|
|                                                                                           | <b>p-values for differences in characteristics between treatment groups within quintiles</b> |          |          |              |              |
|                                                                                           | <b>1</b>                                                                                     | <b>2</b> | <b>3</b> | <b>4</b>     | <b>5</b>     |
| Age                                                                                       | 0.346                                                                                        | 0.386    | 0.851    | 0.944        | 0.908        |
| Intracerebral Haemorrhage                                                                 | 0.390                                                                                        | 0.718    | 0.466    | 0.226        | 0.695        |
| Arm weakness on admission                                                                 | 0.544                                                                                        | 0.674    | 0.547    | 0.696        | 0.498        |
| Impaired speech on admission                                                              | 0.299                                                                                        | 0.906    | 0.845    | <b>0.032</b> | 0.095        |
| Unable to walk on admission                                                               | 0.938                                                                                        | 0.228    | 0.512    | 0.135        | 0.275        |
| Incontinence at 72 hours of admission                                                     | 0.552                                                                                        | 0.555    | 0.765    | 0.468        | 0.811        |
| Atrial fibrillation                                                                       | 0.536                                                                                        | 0.349    | 0.945    | 0.912        | 0.675        |
| Ischaemic heart disease                                                                   | 0.363                                                                                        | 0.861    | 0.223    | <b>0.011</b> | 0.780        |
| Transferred to SU within 3 hours of ED arrival                                            | -                                                                                            | -        | -        | -            | <b>0.012</b> |

There were differences between treatment groups within quintiles of the propensity score where there was good matching of characteristics between treatment groups (Table E). There was a reduced chance of severe complications with greater time spent on a stroke unit within quintile 3 (p=0.013). When quintiles 1, 2 and 3 were aggregated, there was a reduced chance of severe complication (p=0.002) and death in hospital (p=0.039) with greater time spent on a stroke unit. Death was predicted perfectly in the model within quintile 4.

| <b>Table E. Adjusted beta coefficient for differences between treatment groups (Model B)</b> |                                              |                                              |                                              |                                                 |
|----------------------------------------------------------------------------------------------|----------------------------------------------|----------------------------------------------|----------------------------------------------|-------------------------------------------------|
| <b>β coefficient (95% confidence interval), p-value</b>                                      |                                              |                                              |                                              |                                                 |
| <b>reference category: &lt;90% time spent in a stroke unit</b>                               |                                              |                                              |                                              |                                                 |
| <b>Quintile</b>                                                                              | <b>Severe complication</b>                   | <b>Death</b>                                 | <b>Discharged to residential aged care</b>   | <b>Length of stay (discharged)</b>              |
| 1                                                                                            | -0.41 (-0.86, 0.03),<br>0.069                | -0.47 (-0.98, 0.04),<br>0.069                | -0.49 (-1.06, 0.08),<br>0.091                | <b>-5.0 (-7.74, -2.26),</b><br><b>&lt;0.001</b> |
| 2                                                                                            | -0.36 (-1.07, 0.36),<br>0.328                | -0.08 (-0.89, 0.73),<br>0.847                | -0.17 (-0.96, 0.60),<br>0.664                | <b>-2.0 (-3.08, -0.92),</b><br><b>&lt;0.001</b> |
| 3                                                                                            | <b>-1.14 (-2.04, -0.24),</b><br><b>0.013</b> | -1.05 (-2.86, 0.76),<br>0.255                | -0.67 (-1.64, 0.31),<br>0.183                | <b>-3.0 (-4.01, -1.99),</b><br><b>&lt;0.001</b> |
| 4                                                                                            | -0.10 (-1.33, 1.14),<br>0.877                | -                                            | -1.35 (-2.88, 0.18),<br>0.083                | <b>-1.0 (-1.87, -0.13),</b><br><b>0.025</b>     |
| 5                                                                                            | <b>-0.89 (-1.52, -0.15),</b><br><b>0.018</b> | -0.57 (-1.51, 0.36),<br>0.228                | <b>-1.73 (-3.22, -0.24),</b><br><b>0.023</b> | <b>-3.0 (-4.15, -1.85),</b><br><b>&lt;0.001</b> |
| 1, 2 and 3                                                                                   | <b>-0.49 (-0.81, -0.18),</b><br><b>0.002</b> | <b>-0.40 (-0.77, -0.02),</b><br><b>0.039</b> | -0.42 (-0.86, 0.02),<br>0.058                | <b>-3.0 (-3.77, -2.22),</b><br><b>&lt;0.001</b> |
| Overall                                                                                      | <b>-0.52 (-0.81, -0.23),</b><br><b>0.001</b> | <b>-0.41 (-0.77, -0.05),</b><br><b>0.026</b> | <b>-0.59 (-1.02, -0.15),</b><br><b>0.008</b> | <b>-3.0 (-3.80, -2.20),</b><br><b>&lt;0.001</b> |

### **Interpretation of propensity score matching analyses**

There is some evidence of benefit from a greater proportion of time spent in a stroke unit when confounding by indication is controlled

**Supplemental Table F. Association between percentages of hospital stay spent in a stroke unit and in-hospital outcomes of patients with stroke**

| <b>Model</b> | <b>Percentage of time spent in a SU (%)</b>                | <b>aOR<sup>a</sup></b> | <b>95% CI</b>        | <b>P-value</b>   |
|--------------|------------------------------------------------------------|------------------------|----------------------|------------------|
| 1            | Any severe Complications <sup>b</sup>                      |                        |                      |                  |
|              | < 50                                                       | 1                      |                      |                  |
|              | ≥50 to <60                                                 | 1.35                   | (0.68, 2.69)         | 0.40             |
|              | ≥60 to <70                                                 | 0.56                   | (0.23, 1.36)         | 0.20             |
|              | ≥70 to <80                                                 | 0.54                   | (0.23, 1.26)         | 0.15             |
|              | ≥80 to <90                                                 | 0.51                   | (0.25, 1.05)         | 0.07             |
|              | ≥90                                                        | <b>0.47</b>            | <b>(0.30, 0.74)</b>  | <b>0.001</b>     |
| 2            | LOS less than or equal to median LOS (5 days) - discharged |                        |                      |                  |
|              | < 50                                                       | 1                      |                      |                  |
|              | ≥50 to <60                                                 | <b>7.31</b>            | <b>(4.12, 12.97)</b> | <b>&lt;0.001</b> |
|              | ≥60 to <70                                                 | <b>9.15</b>            | <b>(5.14, 16.27)</b> | <b>&lt;0.001</b> |
|              | ≥70 to <80                                                 | <b>6.31</b>            | <b>(3.52, 11.31)</b> | <b>&lt;0.001</b> |
|              | ≥80 to <90                                                 | <b>2.27</b>            | <b>(1.28, 4.02)</b>  | <b>0.005</b>     |
|              | ≥90                                                        | <b>9.71</b>            | <b>(6.42, 14.69)</b> | <b>&lt;0.001</b> |
| 3            | Independent at discharge (mRS 0-2)                         |                        |                      |                  |
|              | < 50                                                       | 1                      |                      |                  |
|              | ≥50 to <60                                                 | 1.67                   | (0.90, 3.10)         | 0.10             |
|              | ≥60 to <70                                                 | 1.61                   | (0.89, 2.91)         | 0.11             |
|              | ≥70 to <80                                                 | <b>2.02</b>            | <b>(1.08, 3.79)</b>  | <b>0.03</b>      |
|              | ≥80 to <90                                                 | 1.07                   | (0.60, 1.90)         | 0.82             |
|              | ≥90                                                        | <b>1.57</b>            | <b>(1.07, 2.28)</b>  | <b>0.02</b>      |

SU: stroke unit; aOR: adjusted odds ratio; CI: confidence interval; LOS: length of stay; mRS: modified Rankin scale. <sup>a</sup>Models adjusted for age, gender, premorbid function, stroke type, stroke severity and past history of atrial fibrillation. <sup>b</sup>a complication considered incapacitating, life threatening and one that prolongs hospital admission and patient acuity including pneumonia, falls, fever, urinary tract infection, seizures, deep vein thrombosis etc.
